# Supplementary material
Source: publisher figshare collection journal article supplement (https://osapublishing.figshare.com/ndownloader/files/13592261)
Supplement: Supplementary file 1 [file 13592261]

Column Name	Description
Point_ID	ID of the measurement sites
Zsd	Measured Zsd
FUI	FUI derived from measured Rrs spectra
a^tr	Measured total absorption coefficient at the transparent window
Rrs spectra	In-situ measured hyperspectral Rrs spectra from 400 nm to 800 nm
Point_ID	Zsd	FUI	a^tr		Rrs spectra	Point_ID	400	401	402	403	404	405	406	407	408	409	410	411	412	413	414	415	416	417	418	419	420	421	422	423	424	425	426	427	428	429	430	431	432	433	434	435	436	437	438	439	440	441	442
D3_1	2	6	0.124871436			D3_1	0.007625971	0.007671681	0.007722126	0.007772954	0.007825234	0.007886155	0.007950234	0.0080157	0.008082299	0.008147526	0.008211104	0.00827679	0.008342471	0.008409288	0.008477786	0.008546993	0.008618682	0.008691993	0.008767804	0.008847133	0.008927393	0.009009746	0.009094965	0.009181881	0.009270421	0.009359819	0.009451317	0.009545375	0.009640755	0.00974045	0.009839502	0.009936972	0.010033834	0.010128735	0.010222456	0.0103143	0.010403536	0.010491385	0.010579872	0.010672436	0.01076625	0.010859317	0.010953571
D3_2	1.8	7	0.163859232			D3_2	0.007907991	0.007962202	0.008019532	0.008079673	0.00814213	0.008214784	0.008287473	0.008359801	0.008434835	0.008510006	0.008585317	0.008659175	0.008732544	0.008807548	0.008885285	0.008964448	0.00904918	0.009134866	0.009222251	0.009315114	0.009409324	0.009505798	0.009604405	0.009704216	0.009807923	0.009912698	0.010019967	0.010130125	0.010241605	0.010356569	0.010473422	0.010591026	0.010705143	0.010817035	0.01092895	0.011037396	0.011142077	0.011246086	0.011349119	0.01145375	0.01155974	0.011664726	0.011768909
D3_3	1.2	12	0.22727554			D3_3	0.007996232	0.007992887	0.00799035	0.007987223	0.007984202	0.007981807	0.007977462	0.007972159	0.00796971	0.007967274	0.007964855	0.007963197	0.007962865	0.007966012	0.007971399	0.007978	0.007985714	0.007994981	0.008006256	0.008020148	0.008034418	0.008048362	0.008063264	0.008078767	0.008093714	0.008108937	0.008124748	0.008141482	0.008158989	0.008180054	0.008202409	0.008225812	0.008251787	0.008279293	0.00831159	0.008346572	0.00838254	0.00842547	0.00847093	0.008522085	0.008578826	0.008637423	0.008702367
D3_4	6.5	5	0.072038517			D3_4	0.002621134	0.002612621	0.002605077	0.00259789	0.002591499	0.002587027	0.002583371	0.00258022	0.00257746	0.002574726	0.002572024	0.00256986	0.002567967	0.002566527	0.002566298	0.002566743	0.002567864	0.002569333	0.002571249	0.002574206	0.002577565	0.00258165	0.002586236	0.00259114	0.002596469	0.00260194	0.002607686	0.0026141	0.00262085	0.002628524	0.002635989	0.002643178	0.002649223	0.002655102	0.002661273	0.002666977	0.002672315	0.002678397	0.002684974	0.002692615	0.002701399	0.002710591	0.002721009
D3_5	6.1	5	0.079361418			D3_5	0.004312325	0.004314369	0.004316662	0.004320656	0.004325601	0.004332759	0.004341155	0.004350242	0.00436039	0.004371054	0.004382328	0.004392481	0.004403558	0.004418263	0.004434427	0.004451299	0.004468346	0.004486488	0.004506109	0.004527297	0.004548794	0.0045706	0.004593111	0.004616034	0.004640096	0.004664756	0.004690593	0.004717842	0.0047456	0.004773989	0.004802438	0.004830681	0.004858476	0.00488571	0.004912736	0.004939945	0.004966825	0.004995179	0.005023889	0.005054097	0.005086051	0.005118378	0.005152562
D3_6	4.5	6	0.162522744			D3_6	0.00448633	0.004494225	0.004501969	0.004507676	0.004512585	0.004516805	0.004522022	0.004527712	0.004532202	0.004537939	0.004545148	0.004551451	0.004558245	0.00456717	0.004575584	0.004583784	0.004593797	0.004604306	0.004615505	0.004628275	0.004640927	0.004652298	0.00466506	0.0046787	0.004692373	0.004705405	0.004717475	0.004729195	0.004740914	0.004753692	0.004766232	0.004778423	0.004792589	0.004807286	0.004823455	0.004840834	0.004858621	0.004879386	0.004900691	0.004923552	0.004947733	0.004972289	0.004999539
D3_7	1.8	7	0.128671397			D3_7	0.007325328	0.007369261	0.007411333	0.007455121	0.007500219	0.007551746	0.007600396	0.007647113	0.007695782	0.007743706	0.007790782	0.007837591	0.00788418	0.007931946	0.007981811	0.00803255	0.008084141	0.008137944	0.008194855	0.008253783	0.00831316	0.00837394	0.008436402	0.008499761	0.008566209	0.00863275	0.00870002	0.008769635	0.008840251	0.008914122	0.008987886	0.009060873	0.009134287	0.009206617	0.009279229	0.009350598	0.009420035	0.009493815	0.009568155	0.009645834	0.009725529	0.009804968	0.009886619
D3_8	1.5	7	0.128099016			D3_8	0.006957257	0.006999286	0.007041844	0.007087052	0.007135079	0.007194216	0.00725384	0.007313509	0.007378829	0.007443755	0.007508215	0.007571577	0.007634956	0.007701172	0.007770374	0.007840821	0.007911864	0.007986007	0.008064517	0.008147105	0.008230145	0.008313567	0.00839953	0.008486907	0.00857762	0.008668776	0.008761443	0.008858023	0.008956168	0.009057799	0.009159862	0.009261389	0.009361241	0.009459453	0.009558344	0.009652882	0.009743293	0.009836058	0.009928713	0.010024183	0.010119468	0.010213401	0.01030869
D3_9	2.8	7	0.143083864			D3_9	0.006111854	0.006142438	0.006172978	0.006209242	0.006248316	0.006295149	0.006343702	0.006392957	0.006444441	0.006496429	0.00654901	0.006601893	0.00665434	0.006707139	0.006762564	0.006819313	0.006879949	0.006941589	0.007004874	0.007071181	0.007138347	0.007207627	0.007279338	0.007352451	0.007425974	0.007499939	0.007575264	0.00765455	0.007735393	0.007819209	0.007902666	0.007984985	0.008065037	0.00814413	0.008225256	0.008303112	0.008377767	0.008454059	0.008530356	0.008609124	0.008690467	0.008771589	0.008852665
D3_10	1.5	8	0.157490207			D3_10	0.007882393	0.007925747	0.007970686	0.008016689	0.008064218	0.008119485	0.00817646	0.008234195	0.008296451	0.008359668	0.008424023	0.008488745	0.008553117	0.008618361	0.008686421	0.008755799	0.008827292	0.008900575	0.008976531	0.0090564	0.009136984	0.009218649	0.009302767	0.009388278	0.009475656	0.009563854	0.009654099	0.009747105	0.009841514	0.009940807	0.010041207	0.010141755	0.010241969	0.010340498	0.010438828	0.01053376	0.010625169	0.01071815	0.010810356	0.010904137	0.010999842	0.011094947	0.011190525
D3_11	1.6	8	0.180059754			D3_11	0.007333881	0.007372154	0.007412787	0.007457147	0.007504157	0.007560432	0.007618047	0.007676095	0.007736567	0.007795791	0.007853553	0.007911559	0.00796942	0.008028684	0.008090888	0.008154521	0.00822156	0.008291115	0.008364262	0.008440664	0.008517401	0.008594465	0.008674597	0.008756514	0.008840382	0.00892461	0.009010114	0.00909853	0.009188421	0.009283679	0.009377719	0.009469703	0.009561494	0.009651436	0.009740397	0.009827629	0.009912415	0.009997353	0.010082736	0.010171708	0.010261746	0.010351186	0.010444319
D3_12	1.5	7	0.172827319			D3_12	0.009864622	0.00989807	0.009937994	0.009971685	0.01000687	0.010054732	0.010106249	0.010159681	0.010219221	0.010275913	0.010329275	0.01038374	0.010437795	0.010492008	0.010550635	0.010611325	0.010672986	0.010736895	0.010804017	0.010870311	0.010936967	0.011006916	0.011078093	0.011149839	0.011219067	0.011290546	0.01136652	0.011450596	0.011539414	0.011645145	0.011748075	0.011847314	0.011947367	0.012044567	0.012137834	0.012225618	0.012308746	0.012388687	0.012471278	0.012561433	0.012648927	0.01273467	0.012826777
D3_13	2.6	7	0.146889468			D3_13	0.006641828	0.006682611	0.006725341	0.006773899	0.006824221	0.006879771	0.006936767	0.006994274	0.00705559	0.007116625	0.007177327	0.007236997	0.007296667	0.007359094	0.007423766	0.00748929	0.0075559	0.007624768	0.007696946	0.007771298	0.00784606	0.007922369	0.008000429	0.008079377	0.008161952	0.008244822	0.00832894	0.008416707	0.008505828	0.008598007	0.008690605	0.008782731	0.008873335	0.008961879	0.009049487	0.009134199	0.009215745	0.009300472	0.009384526	0.009470193	0.00955687	0.009642695	0.00973027
D3_14	0.2	16	0.592988683			D3_14	0.009127279	0.009261582	0.009404	0.009567718	0.009739825	0.009937878	0.010138159	0.010337993	0.010542298	0.010740337	0.010931265	0.011117718	0.011299707	0.011478633	0.011659926	0.011841372	0.012028957	0.012218851	0.0124131	0.012608099	0.012803814	0.013007068	0.013215742	0.013427016	0.013637089	0.013848856	0.014066047	0.014295399	0.014528752	0.014771816	0.015011772	0.015246571	0.015479634	0.015706274	0.015927516	0.016139065	0.016340996	0.016547279	0.01675008	0.016954181	0.017158652	0.017360079	0.017567109
D3_15	0.5	15	0.426105803			D3_15	0.011470128	0.011533247	0.011603077	0.011679329	0.011760569	0.011860186	0.011963677	0.012068518	0.012173816	0.012277148	0.012378187	0.012481265	0.012583286	0.012685067	0.012791214	0.012899289	0.013013328	0.013129866	0.01325037	0.013376623	0.013503586	0.013631891	0.013765261	0.013901487	0.014045937	0.014191913	0.014341799	0.014498009	0.014656526	0.014821078	0.014987225	0.015153417	0.01531253	0.015467799	0.015622885	0.015771819	0.015914522	0.016061353	0.01620526	0.016348941	0.016494139	0.016637492	0.016780455
D3_16	0.2	16	0.460405916			D3_16	0.011672798	0.011734304	0.011801257	0.011872906	0.011949238	0.01204387	0.012140276	0.012237061	0.012338025	0.012437179	0.01253422	0.01263297	0.012730949	0.012829634	0.012934226	0.013041518	0.013154429	0.013270148	0.013390207	0.013516468	0.013644849	0.013779379	0.013916284	0.014054235	0.014198227	0.014343965	0.014494121	0.014648601	0.014804625	0.014966216	0.015128575	0.01529013	0.015449954	0.015605872	0.015759252	0.015909662	0.016055619	0.0162	0.016342089	0.016485326	0.016630099	0.016773027	0.016916253
D3_17	3	6	0.115730746			D3_17	0.011224399	0.011301711	0.011378151	0.011461089	0.011542858	0.011621909	0.011701305	0.011780368	0.011862588	0.011946198	0.012031501	0.01212028	0.012210095	0.012304501	0.012401406	0.012499205	0.012599776	0.012702165	0.01280751	0.012915372	0.013023708	0.013134382	0.013247377	0.013361499	0.013479024	0.013596515	0.013715061	0.013831876	0.013947708	0.014063643	0.014182111	0.014301977	0.014424236	0.014544708	0.014665092	0.014785332	0.014903392	0.01502504	0.015143651	0.015260878	0.015378369	0.015494262	0.015611774
D3_18	4.7	5	0.077785053			D3_18	0.008209276	0.008245795	0.00828216	0.008323617	0.008366386	0.008412798	0.008463925	0.008517355	0.008572397	0.008627782	0.008683612	0.008740428	0.008798105	0.008859952	0.008923543	0.008987772	0.009054091	0.009123234	0.009196374	0.009273461	0.009350679	0.009427388	0.009506789	0.009587655	0.009670341	0.009754069	0.009840398	0.009928292	0.010016816	0.010108889	0.010200155	0.010289814	0.010378994	0.010465961	0.010551194	0.010634588	0.010715444	0.010797059	0.010878602	0.01096282	0.011047608	0.011131325	0.011215974
D3_19	8	5	0.05380098			D3_19	0.006397572	0.006400801	0.006375768	0.006385976	0.006405913	0.006431894	0.00646132	0.00649073	0.006478078	0.006495244	0.006547736	0.006600909	0.006650677	0.006691774	0.006736739	0.006785474	0.006870319	0.006931818	0.00696442	0.006991415	0.007023268	0.007076688	0.007135822	0.007198601	0.007239827	0.007292957	0.007366885	0.007449124	0.007532251	0.007602493	0.007683937	0.007775616	0.007839286	0.007898766	0.007960756	0.00801856	0.008073011	0.008119049	0.008164118	0.008209214	0.008273734	0.008342857	0.008391776
D3_20	2.5	6	0.133858158			D3_20	0.008435427	0.008465288	0.008479256	0.008523683	0.008577817	0.008644145	0.008716226	0.008790079	0.008839494	0.008899109	0.008970846	0.009027961	0.009083073	0.00914143	0.009197704	0.00925332	0.009321475	0.009386555	0.009448115	0.009518628	0.009592672	0.00967374	0.009757693	0.00984339	0.009919966	0.010003388	0.010099085	0.010187911	0.01027542	0.010371121	0.010462547	0.010548989	0.010637895	0.010722315	0.010796005	0.010881001	0.010971224	0.011051899	0.011129594	0.011204777	0.011287449	0.011373287	0.011475756
D3_21	1	10	0.211537241			D3_21	0.011261837	0.011327126	0.011395151	0.011469299	0.011546713	0.011636539	0.011729962	0.011824737	0.011921358	0.012017362	0.012112659	0.012209342	0.012305681	0.012403878	0.012504906	0.012607259	0.012717261	0.012830282	0.012947857	0.013070824	0.013195138	0.01332298	0.013456161	0.013592431	0.013732912	0.013875088	0.01402139	0.014173194	0.014327039	0.014485864	0.014645063	0.014803126	0.014959667	0.015112564	0.01526305	0.015409595	0.015551326	0.015693447	0.015833055	0.01597302	0.016114196	0.01625366	0.016393123
D3_22	1.5	10	0.182083172			D3_22	0.010308279	0.010367015	0.010432104	0.010502811	0.010579091	0.010675923	0.010775845	0.010876894	0.01098226	0.011086683	0.011190048	0.011299084	0.011407834	0.011516836	0.011631116	0.011747931	0.011873138	0.012002152	0.012136788	0.012276193	0.012417006	0.012562452	0.012712804	0.012865874	0.013030176	0.013195848	0.013365243	0.013541842	0.013721408	0.013909785	0.014096916	0.01428114	0.014459484	0.014633835	0.014807882	0.01497456	0.015134052	0.015292243	0.015447751	0.015603968	0.015761076	0.015915748	0.016067062
D3_23	3	7	0.16712186			D3_23	0.009430415	0.009502476	0.009575856	0.009651543	0.00972754	0.009808652	0.009893262	0.009979134	0.010063	0.010148716	0.010236628	0.010326057	0.010415502	0.010507347	0.01059986	0.010692597	0.010791752	0.010892791	0.010996873	0.011104793	0.011213619	0.011324957	0.011439641	0.011556217	0.01167559	0.011795141	0.01191594	0.012036663	0.01215746	0.012281054	0.012406386	0.012532254	0.012659324	0.012784745	0.012910879	0.013036181	0.013158874	0.013283539	0.013405372	0.013526223	0.0136477	0.013767615	0.013887523
D3_24	17	3	0.037003813			D3_24	0.00441033	0.004387101	0.00436449	0.004342925	0.004323378	0.004308418	0.004289863	0.004269505	0.004251838	0.004237792	0.004228036	0.004215434	0.004202792	0.004191074	0.004185313	0.004182652	0.00417892	0.004173771	0.004166813	0.004161069	0.004155704	0.004150714	0.004144337	0.004137057	0.004134243	0.004131089	0.004127264	0.004125593	0.004124639	0.004123691	0.00412129	0.004117487	0.004109571	0.004101278	0.004093293	0.004085515	0.004077982	0.00407025	0.004062744	0.004055406	0.004051213	0.004048434	0.004047723
D3_25	16.5	3	0.030932274			D3_25	0.005023971	0.004994222	0.004967961	0.004943026	0.004919936	0.004900373	0.00487973	0.0048588	0.004841851	0.004824516	0.004806718	0.004789206	0.004772455	0.004757212	0.004744263	0.004732514	0.004719478	0.004707499	0.004696766	0.004685421	0.004674293	0.004664154	0.004654423	0.00464499	0.004635391	0.004625614	0.004615458	0.004607474	0.004600233	0.004593027	0.004582671	0.004569334	0.004554352	0.00453874	0.004521171	0.004502787	0.004484232	0.004466751	0.004450374	0.004435378	0.004421736	0.004408961	0.004398094
D3_26	13.5	3	0.047423387			D3_26	0.004803115	0.004766626	0.004740207	0.004708747	0.004678598	0.004654796	0.00463332	0.00461336	0.004594463	0.004575055	0.004555043	0.004535988	0.004517417	0.00449919	0.004483821	0.004470221	0.004460498	0.004451527	0.00444345	0.004435977	0.00442917	0.004424173	0.004419328	0.004414593	0.004411602	0.004408993	0.004406979	0.004406871	0.004407408	0.004408037	0.004407471	0.004405739	0.004400563	0.004394602	0.004387519	0.004380834	0.004374488	0.004371628	0.004368997	0.004366564	0.004367479	0.004369642	0.004371908
D3_27	14	4	0.043321385			D3_27	0.00429598	0.004284783	0.004275427	0.00425751	0.004240664	0.004233197	0.004231294	0.004232291	0.004226696	0.004222188	0.00421897	0.004211848	0.00420474	0.004199426	0.004193205	0.004186956	0.004188746	0.004191324	0.004194907	0.004202549	0.00420897	0.004208305	0.004209544	0.004212035	0.00421433	0.004217397	0.004221791	0.004222487	0.004222812	0.00422936	0.004235099	0.004239994	0.004241987	0.004243395	0.004244394	0.004247488	0.004251748	0.004256784	0.004262664	0.004270195	0.004282461	0.004296208	0.004308608
D3_28	4	5	0.080796381			D3_28	0.008180376	0.008214708	0.00825483	0.008285509	0.008314903	0.008349827	0.008398886	0.008455178	0.008501853	0.008547499	0.008591952	0.00864235	0.008693762	0.008746934	0.008795722	0.008842702	0.008904148	0.00896722	0.009032736	0.009101041	0.009169644	0.009238681	0.009309767	0.009381985	0.009452208	0.00952239	0.009593184	0.009664726	0.009736998	0.009814582	0.009893084	0.009971792	0.010047213	0.010121082	0.01019548	0.010267783	0.010337628	0.010411939	0.010485306	0.010559338	0.010640121	0.010722395	0.010807355
D3_29	12.5	4	0.045202772			D3_29	0.004945676	0.004928055	0.004912826	0.004896855	0.004881153	0.004865719	0.004855314	0.004847899	0.004841953	0.004836004	0.00483005	0.004822123	0.004816304	0.004817402	0.004815756	0.004812794	0.004811954	0.004812515	0.00481483	0.004818679	0.004822665	0.004826125	0.004832253	0.004840114	0.004842983	0.004846421	0.004850929	0.004856158	0.004861492	0.004865962	0.004868871	0.004870235	0.004874808	0.004879546	0.004883597	0.004888006	0.004892548	0.004898871	0.004906887	0.004918095	0.004930638	0.004943521	0.004956766
D3_30	14.5	4	0.031501368			D3_30	0.005217137	0.005203968	0.005190747	0.005179734	0.005169823	0.005161086	0.005154836	0.005150128	0.0051474	0.005145961	0.005146044	0.005145302	0.005145148	0.00514712	0.005151029	0.005155996	0.005162184	0.005169169	0.005177196	0.005186879	0.005196918	0.005207225	0.005217859	0.005228679	0.005240753	0.005253041	0.005265777	0.005279821	0.005294332	0.005309357	0.005323457	0.005336525	0.005348461	0.005360162	0.005372252	0.005384086	0.005395568	0.005408745	0.005422821	0.005438898	0.005456557	0.005474719	0.005494863
D3_31	11	4	0.030580937			D3_31	0.00576312	0.005755848	0.005750766	0.005739805	0.005728822	0.005721667	0.005715931	0.005711066	0.005706732	0.00570279	0.005699309	0.005699977	0.005701497	0.005703464	0.005708145	0.00571429	0.005721757	0.005730289	0.005740208	0.005750997	0.00576198	0.005773245	0.005783966	0.005794298	0.005804703	0.005815201	0.005825954	0.005836687	0.00584743	0.005858557	0.005869999	0.005881643	0.005893654	0.005905338	0.005916477	0.005927392	0.005937991	0.0059516	0.005965964	0.005982035	0.005999511	0.006017419	0.006037299
D3_32	11	4	0.0478609			D3_32	0.005441669	0.005450525	0.005454893	0.005454786	0.005455012	0.005459994	0.00547105	0.005484765	0.00548227	0.00548571	0.005496142	0.005505625	0.005514388	0.005521864	0.005533034	0.00554662	0.005570593	0.005592128	0.00561076	0.005629557	0.005648631	0.005668988	0.005690365	0.005712336	0.00573448	0.00575681	0.00577968	0.005807325	0.005836682	0.00586783	0.005896709	0.005923122	0.005944791	0.005966647	0.005992346	0.006015511	0.006036804	0.006064262	0.006091026	0.006117279	0.00614857	0.006181299	0.006214657
D3_33	2.5	7	0.136498068			D3_33	0.009522667	0.00959152	0.009662578	0.009739536	0.009818866	0.009907986	0.010000291	0.010093806	0.010191204	0.010287005	0.010380973	0.010473341	0.010563916	0.010653543	0.01074607	0.010839588	0.01093373	0.011029783	0.011128876	0.011232616	0.011337374	0.011444761	0.011554771	0.011666127	0.011779707	0.011893669	0.012009372	0.012129607	0.01225217	0.012383724	0.012513273	0.012639658	0.012765553	0.012889505	0.013014341	0.013133627	0.01324759	0.013362129	0.013476634	0.013595064	0.013715818	0.013835475	0.013954368
D3_34	5	6	0.113781342			D3_34	0.006379418	0.006432345	0.006476813	0.0065166	0.006574205	0.00663278	0.00669686	0.006761772	0.006826924	0.006887623	0.00694656	0.00700741	0.007066422	0.007123918	0.007186986	0.007251363	0.007319894	0.007390047	0.0074644	0.007543075	0.007624242	0.007710255	0.007797287	0.007886138	0.007976916	0.008069665	0.008169693	0.00827551	0.008392845	0.008508594	0.008621401	0.008737391	0.008850744	0.008958304	0.009060928	0.009158356	0.009255174	0.009351374	0.009455898	0.009558873	0.009660427	0.009764741	0.009867639
D3_35	6	6	0.079273371			D3_35	0.004133599	0.004193948	0.004242639	0.004285258	0.004331337	0.004384917	0.004462259	0.004533363	0.004599104	0.00464873	0.004696503	0.004756192	0.004813942	0.004870056	0.004925077	0.004979788	0.005052222	0.005127589	0.005209796	0.005296707	0.005386297	0.005482025	0.005576674	0.005667432	0.005749983	0.005827023	0.005897624	0.005979533	0.006100079	0.006205772	0.006297389	0.006403448	0.006510078	0.006616431	0.006717946	0.00681436	0.006895554	0.006976327	0.007077253	0.007173244	0.00726461	0.007363011	0.007461228
D3_36	14	3	0.031090824			D3_36	0.005431484	0.005405678	0.00537708	0.005348267	0.005325041	0.005302697	0.005280959	0.005262922	0.005247927	0.005233284	0.005219336	0.005207141	0.005195925	0.005185738	0.005175612	0.00516562	0.00515556	0.005145549	0.005135482	0.005124338	0.005112602	0.005101778	0.005091154	0.005080959	0.005070728	0.005060405	0.005052983	0.005045606	0.005037611	0.00502813	0.005017525	0.005005458	0.004992928	0.004978516	0.004963882	0.004949134	0.004933947	0.004919376	0.004906497	0.004894167	0.004882343	0.00487076	0.004859719
D3_37	17	3	0.03515319			D3_37	0.004845462	0.004832698	0.004813695	0.004792884	0.004779154	0.004767519	0.0047604	0.004752764	0.004744783	0.004737005	0.004729192	0.004719868	0.004711227	0.004703295	0.004695389	0.004687649	0.004681313	0.004675353	0.004670012	0.004667185	0.004665696	0.004663969	0.004661384	0.004656501	0.004652499	0.004649118	0.004647863	0.004647202	0.00464786	0.004642707	0.004632728	0.004628033	0.004623283	0.004614511	0.004603505	0.004590568	0.004577797	0.004565863	0.004556355	0.004546803	0.004537203	0.004530455	0.004524889
D3_38	13	3	0.03764026			D3_38	0.005126611	0.00509518	0.005065372	0.005037184	0.005011422	0.004988041	0.004969472	0.004953914	0.004940807	0.004929877	0.004919527	0.004909079	0.004899904	0.004892169	0.004885743	0.004880051	0.004879423	0.004878673	0.004877678	0.004877234	0.004877085	0.004879707	0.004881288	0.004879711	0.004877775	0.004875563	0.004875278	0.004877539	0.004888146	0.004895382	0.004899638	0.004903499	0.004906835	0.004908468	0.004909783	0.004910801	0.004907404	0.00490457	0.004907825	0.00491334	0.004920998	0.00493041	0.004941016
D3_39	10	4	0.042045169			D3_39	0.006308657	0.006320532	0.006326636	0.006330312	0.006339291	0.006349533	0.00636363	0.006378394	0.006393601	0.006412975	0.006432406	0.006450543	0.006468581	0.006486711	0.006508024	0.006530171	0.00655326	0.006577878	0.006605851	0.006634446	0.006663397	0.006696174	0.006728747	0.006760331	0.006793429	0.006827815	0.006862812	0.00690015	0.006943566	0.006986486	0.007028371	0.007073134	0.007116825	0.007156868	0.007194136	0.007228618	0.007266886	0.007305864	0.007349371	0.007393093	0.007437015	0.007484983	0.007533328
D3_40	8	4	0.049514704			D3_40	0.003865871	0.003849905	0.003839094	0.003830626	0.003825962	0.003820605	0.003812788	0.003802817	0.003791228	0.003783256	0.003775586	0.003764931	0.003753873	0.003742182	0.003732556	0.003724241	0.00372737	0.003729733	0.003730687	0.003733378	0.003736995	0.003739625	0.003742543	0.003746357	0.003749991	0.003753511	0.003759626	0.003766749	0.003776088	0.003780974	0.003782034	0.00378627	0.003788638	0.003781506	0.003775352	0.003770121	0.003761155	0.003753394	0.003753494	0.003754657	0.003756827	0.003764591	0.003773977
D3_41	15	3	0.04217024			D3_41	0.005547686	0.00550566	0.005464312	0.005424523	0.005380967	0.005339306	0.005300218	0.005261656	0.00522378	0.005189042	0.005155663	0.005122591	0.005091771	0.005063288	0.005036937	0.005011685	0.004987993	0.004963618	0.004937567	0.004914133	0.004892065	0.004867472	0.004842941	0.004818879	0.004795129	0.004771471	0.004750535	0.004728945	0.004705117	0.004680561	0.004655724	0.004629743	0.004604003	0.004578249	0.00455369	0.004530374	0.004509285	0.004489597	0.004472395	0.004456774	0.004442647	0.004433503	0.004425565
D3_42	15	3	0.048485018			D3_42	0.00500653	0.004978367	0.004947748	0.004917152	0.004889142	0.004862337	0.00483686	0.004813371	0.004791613	0.004775861	0.004761786	0.004749522	0.004737385	0.004725248	0.004715394	0.004706454	0.004698013	0.004689251	0.004679737	0.004670392	0.004661128	0.0046505	0.004639647	0.004628328	0.004616173	0.00460334	0.004591733	0.004580372	0.004570024	0.004560128	0.004550748	0.004540494	0.004530472	0.004521259	0.004513346	0.004506654	0.004501211	0.004496803	0.004495661	0.004495831	0.004497245	0.004500453	0.004504502
D3_43	17	2	0.036487549			D3_43	0.007658445	0.00761822	0.007577379	0.007537703	0.007498318	0.007460479	0.007424147	0.007388625	0.007353927	0.007321321	0.007290301	0.007262234	0.007233568	0.007203845	0.00717456	0.007145836	0.00711736	0.007088065	0.007056658	0.007023834	0.00699024	0.006954413	0.006919014	0.006884968	0.006851276	0.006817671	0.006785577	0.00675373	0.006723949	0.006692788	0.006660898	0.00662614	0.00659098	0.006553887	0.006516221	0.006478334	0.006439406	0.006401102	0.006362082	0.006321865	0.006280529	0.006241143	0.006202974
D3_44	17	3	0.047930596			D3_44	0.004990968	0.004955433	0.004917958	0.004880886	0.004847631	0.004814914	0.004781322	0.004749189	0.004718432	0.004689239	0.004661296	0.004635348	0.004609726	0.004584168	0.00456154	0.004540227	0.00452032	0.004500492	0.004480519	0.004460999	0.004441689	0.004423222	0.004404775	0.004386305	0.004367616	0.004348649	0.004333337	0.00431852	0.004304863	0.004288602	0.004270358	0.004254126	0.004238038	0.004220118	0.004202666	0.004185748	0.004169019	0.004153524	0.004141965	0.004130377	0.004118754	0.004110984	0.004104254
D3_45	10	3	0.060406712			D3_45	0.006377077	0.006320009	0.006260547	0.006202068	0.006139172	0.006077899	0.006016911	0.005960166	0.005907184	0.005857531	0.005810006	0.005764656	0.005721168	0.005679318	0.005639079	0.005599942	0.005561914	0.005523354	0.005483119	0.005443918	0.005405245	0.005368345	0.005331351	0.005293798	0.005255558	0.0052166	0.005180464	0.005143485	0.005104216	0.005063869	0.005023168	0.004984712	0.004947826	0.004913072	0.004880336	0.004849613	0.00482319	0.004798461	0.004775221	0.004752898	0.004731424	0.004714856	0.004699793
D3_46	15	3	0.040271325			D3_46	0.005676984	0.005641701	0.005604006	0.005566649	0.005534169	0.005500986	0.005463311	0.005429461	0.005398832	0.005366046	0.00533399	0.005303907	0.005275468	0.005248649	0.005226653	0.005206506	0.005184668	0.005163868	0.005144665	0.005125376	0.005106025	0.005087075	0.005067782	0.00504748	0.005027341	0.005007215	0.004992664	0.004978476	0.004964128	0.004945709	0.004924109	0.004902395	0.004880307	0.004855301	0.004830964	0.004807406	0.004784137	0.004762024	0.004742532	0.004724791	0.004708708	0.004697575	0.004687193
D3_47	17	2	0.021142215			D3_47	0.007129384	0.007092857	0.007054717	0.00701714	0.006984752	0.006952386	0.006917699	0.006887508	0.006861055	0.006838089	0.006815905	0.006791872	0.006769549	0.006749023	0.006728161	0.006707414	0.00668649	0.006665083	0.006642431	0.006620848	0.00659979	0.006573059	0.006546087	0.00651917	0.006489686	0.00645814	0.006430832	0.006403748	0.006377365	0.00634869	0.006318456	0.006287907	0.00625703	0.006223001	0.00618795	0.006152213	0.006113309	0.00607455	0.006035059	0.005995253	0.005955124	0.005913683	0.005873023
D3_48	17	2	0.031291189			D3_48	0.007652717	0.007591671	0.007529733	0.007469368	0.00740826	0.007349164	0.007291667	0.007236763	0.007184301	0.007134434	0.007086039	0.007037137	0.006990407	0.006945695	0.006902942	0.006861321	0.006818906	0.006776004	0.006731507	0.006688422	0.00664602	0.006600137	0.006554179	0.006508441	0.006462636	0.006416501	0.006373733	0.006330198	0.00628501	0.006237441	0.006188504	0.006136658	0.006085151	0.006033375	0.00598271	0.005933376	0.005885852	0.005840242	0.005797115	0.005755266	0.005714597	0.00567925	0.005645761
D3_49	13	3	0.089474252			D3_49	0.004247554	0.004210604	0.004181717	0.004156942	0.00412126	0.004088199	0.004060507	0.00403259	0.004004587	0.003984749	0.003964429	0.003930447	0.003900187	0.003874135	0.003854952	0.003838357	0.003821999	0.003805475	0.003788306	0.003772654	0.003757794	0.003745394	0.003734507	0.003727464	0.003713243	0.003693681	0.003675146	0.003659195	0.003653211	0.003639888	0.003620466	0.003602178	0.003585067	0.003571212	0.003557272	0.003543381	0.003523558	0.003504636	0.003492653	0.003479677	0.003465777	0.003455044	0.003445581
D3_50	15	2	0.02173421			D3_50	0.006840954	0.006814405	0.006788383	0.00676337	0.006738242	0.006713909	0.0066901	0.006670421	0.00665412	0.006638479	0.006623131	0.006606732	0.00659114	0.006576324	0.006563199	0.006550677	0.006534997	0.006517696	0.006497021	0.006475648	0.006453903	0.006431667	0.006409028	0.006385261	0.006360519	0.006334931	0.006314578	0.006294796	0.006275967	0.006255172	0.006232982	0.006207472	0.006181624	0.00615483	0.006127178	0.006098929	0.006067249	0.00603525	0.006001358	0.005965884	0.005928894	0.005892222	0.005855929
D3_51	1	8	0.185154115			D3_51	0.007530932	0.007574899	0.007619171	0.007661925	0.007715828	0.007768168	0.007819748	0.007872374	0.007925607	0.007979173	0.008031872	0.008086425	0.008138949	0.008189583	0.008247248	0.008306528	0.008371693	0.008438122	0.008508588	0.008581681	0.008655999	0.008737327	0.008819745	0.00890502	0.008993532	0.009084767	0.009177853	0.009275664	0.009385167	0.009496607	0.009608055	0.009721453	0.009832916	0.009941121	0.010045462	0.010145364	0.010243028	0.010338662	0.010439293	0.010540263	0.010641386	0.010741627	0.010839912
D3_52	5	5	0.065659816			D3_52	0.007856622	0.007871623	0.007883194	0.007893032	0.007908638	0.007926756	0.007952697	0.00797998	0.008008191	0.00803196	0.008054611	0.008078294	0.008100066	0.00811977	0.008141818	0.008164429	0.008189937	0.008216124	0.008244178	0.00827484	0.008306848	0.00834495	0.00838335	0.008422103	0.008462289	0.008503703	0.008547847	0.00859527	0.008650995	0.008706808	0.008761891	0.008816946	0.00887075	0.008922351	0.008972213	0.009020071	0.009065623	0.009111112	0.009163863	0.009217639	0.00927231	0.009329368	0.009386574
D3_53	12	4	0.047789035			D3_53	0.006229653	0.006201962	0.006173861	0.006146576	0.006121009	0.006096151	0.006071406	0.006050397	0.006032419	0.006014056	0.005995462	0.005973574	0.005952521	0.005932272	0.005914472	0.005897697	0.005879641	0.005863262	0.005849723	0.005835763	0.005821576	0.005812463	0.005802492	0.005789616	0.005780984	0.005775413	0.005764913	0.005756378	0.005757532	0.005752014	0.005740854	0.005733553	0.005725115	0.005709053	0.005694448	0.005681294	0.005666278	0.005652777	0.005646303	0.005639443	0.005632227	0.005627973	0.005625681
D3_54	1.5	10	0.195036017			D3_54	0.005234425	0.005295462	0.005362829	0.005430347	0.005508354	0.0055876	0.005675112	0.005763678	0.005852638	0.005941601	0.006027302	0.006105001	0.006184046	0.006265564	0.00634881	0.006431785	0.006523906	0.006617429	0.006715547	0.00681919	0.006925722	0.007047304	0.007170288	0.007295739	0.007423262	0.007552927	0.007692126	0.007837965	0.007996124	0.008155938	0.008314952	0.008476945	0.008637379	0.008797995	0.008950229	0.009093613	0.009233869	0.009372447	0.009522038	0.009671234	0.009819906	0.009961405	0.01010018
D3_55	14	4	0.03458302			D3_55	0.002573482	0.002572324	0.002564326	0.002553987	0.00255344	0.002553359	0.002554012	0.002558144	0.002564974	0.002565892	0.002566869	0.002574305	0.002579312	0.002581453	0.002587978	0.00259596	0.002605965	0.00261379	0.002617662	0.002626922	0.00263902	0.002651023	0.002660946	0.002665347	0.002668489	0.00267073	0.002679103	0.002687447	0.002692803	0.002695074	0.0026947	0.002696917	0.002699055	0.002699307	0.002699104	0.002698494	0.002697722	0.002698167	0.002704434	0.002710522	0.002716439	0.002727944	0.002740591
D3_56	14	4	0.054990368			D3_56	0.003891631	0.003883384	0.003869105	0.00385297	0.003835996	0.003818978	0.003800706	0.003789938	0.003785126	0.003779178	0.003773614	0.003770664	0.003769569	0.003770705	0.003772978	0.003775527	0.003776245	0.003776154	0.003774523	0.003771594	0.003767976	0.003762431	0.003756547	0.003749934	0.003740769	0.003729699	0.003717888	0.003706504	0.003697547	0.003687325	0.00367617	0.003667323	0.003659348	0.00365289	0.003648826	0.003646945	0.003645309	0.003644448	0.00364688	0.003649345	0.003651843	0.003654493	0.003657418
D3_57	18	3	0.026862074			D3_57	0.004669502	0.0046531	0.004634736	0.004616189	0.004598377	0.00458126	0.00456486	0.004552167	0.004542472	0.004532726	0.004523313	0.00451464	0.00450673	0.004499647	0.004494276	0.004489442	0.004481962	0.004474337	0.004466306	0.004457845	0.004449156	0.004439271	0.004429377	0.004419555	0.004408863	0.004397476	0.00439018	0.004383372	0.004377035	0.004369535	0.004361149	0.004351452	0.004341404	0.004330158	0.004317553	0.004303807	0.004289501	0.004275462	0.004261649	0.004247724	0.004233689	0.004221213	0.004209064
D3_58	14	3	0.043848882			D3_58	0.004572919	0.004541742	0.004512521	0.004485036	0.004457452	0.004431129	0.004406281	0.004381931	0.004358154	0.004335923	0.004314655	0.004294284	0.004274169	0.00425409	0.004234547	0.004215618	0.004200032	0.004185561	0.004172904	0.004158573	0.004143375	0.004132678	0.004121673	0.004109244	0.004097071	0.004085024	0.004073019	0.004060944	0.004049173	0.004035119	0.004019331	0.004002405	0.003985152	0.003966114	0.003948119	0.003931186	0.003914087	0.003898127	0.003885789	0.003874682	0.003864739	0.003857036	0.003849989
D3_59	1.7	6	0.116604712			D3_59	0.007554685	0.007593918	0.007630359	0.007664437	0.007705219	0.007747537	0.007796735	0.007846682	0.007896977	0.007942362	0.007986288	0.008032638	0.008078944	0.008125698	0.008177277	0.008229756	0.008284178	0.008340105	0.008400122	0.008465465	0.008533544	0.008604645	0.008676262	0.008749363	0.008824648	0.00890187	0.008984536	0.009071226	0.009165837	0.009260894	0.009354964	0.009452042	0.009547927	0.00964234	0.009732126	0.009816977	0.009898628	0.009980405	0.010075566	0.010169549	0.010262304	0.010355962	0.010448779
D3_60	28.55942484	2	0.019602557			D3_60	0.009713719	0.009650552	0.00958585	0.009522773	0.009458662	0.00939697	0.009337449	0.009279126	0.009222137	0.009164627	0.00910822	0.009050659	0.008993953	0.008937564	0.008879396	0.008821386	0.008760948	0.008699212	0.008633782	0.008566844	0.008499136	0.008431527	0.008364063	0.008296649	0.00823102	0.008166349	0.00810847	0.00805057	0.007992973	0.007932408	0.007870174	0.007803737	0.007736707	0.007665758	0.007594999	0.00752495	0.007450716	0.007376803	0.007299329	0.007221637	0.007143752	0.007066246	0.006989838
D3_61	20	2	0.01825585			D3_61	0.009950305	0.009904431	0.009850084	0.009794065	0.009735404	0.009679154	0.009625845	0.009576583	0.009530881	0.009488445	0.00944797	0.009410076	0.009372051	0.009333348	0.009291659	0.009249089	0.00919762	0.009143287	0.009082641	0.009017627	0.008950258	0.008878905	0.008806815	0.008732904	0.008659099	0.00858492	0.008515158	0.008445487	0.008377829	0.008308668	0.008239109	0.008169627	0.008101305	0.008032749	0.0079657	0.007900401	0.007831083	0.007761926	0.007689807	0.007616223	0.007541181	0.007464742	0.007388592
D3_62	23	2	0.016500898			D3_62	0.00989415	0.009881602	0.00986698	0.009851997	0.009846467	0.009841727	0.009838291	0.009835736	0.009833891	0.009826006	0.009815855	0.009797083	0.009775347	0.00974972	0.009720111	0.009689138	0.009648929	0.009604879	0.009552778	0.009497679	0.009440993	0.009382502	0.009322755	0.009259542	0.009198185	0.009137813	0.009087571	0.009037946	0.008988838	0.00893551	0.008879296	0.008819428	0.008758027	0.008688331	0.008616526	0.008543237	0.008464636	0.00838601	0.008303629	0.00821774	0.00812845	0.008040093	0.007952597
D3_63	26.58980933	2	0.025025373			D3_63	0.008399164	0.008355101	0.008308647	0.008262614	0.008216302	0.008172595	0.008133147	0.008094408	0.008056517	0.008019601	0.007983503	0.0079464	0.007910377	0.007875185	0.00783992	0.007804932	0.007767418	0.007728674	0.007686991	0.007644262	0.00760095	0.007556911	0.007512329	0.007466244	0.007421208	0.007376655	0.007337964	0.007299286	0.007260299	0.007218257	0.007174159	0.007127495	0.007080368	0.007029864	0.006979599	0.006929844	0.006877815	0.006826549	0.006775622	0.006724098	0.006671967	0.006622443	0.00657392
D3_64	28.01184896	2	0.023247788			D3_64	0.010404199	0.01034977	0.010291657	0.010233776	0.010177702	0.01012393	0.010072856	0.010023059	0.009974647	0.009927285	0.009880663	0.009831111	0.009782115	0.009733124	0.009683292	0.009633546	0.00957926	0.009523067	0.009462416	0.009400397	0.009337589	0.009273619	0.00920912	0.00914319	0.009078087	0.009013166	0.008955179	0.008897034	0.008838525	0.008776341	0.008711819	0.008643307	0.008574742	0.008503905	0.008431655	0.008358537	0.00828254	0.008206799	0.008127248	0.008046902	0.007965721	0.007884935	0.007804799
D3_65	28.55942484	1	0.019095424			D3_65	0.01431264	0.014234237	0.014148711	0.014063023	0.013987596	0.013915736	0.013848199	0.013779749	0.013711134	0.013640639	0.013571169	0.013499943	0.013425653	0.01334667	0.013266535	0.013186494	0.013094024	0.012999936	0.012901196	0.012797219	0.012690467	0.012585726	0.012479421	0.012368165	0.012258528	0.012149424	0.012053725	0.011957325	0.011857841	0.011751164	0.011639775	0.01152368	0.011407504	0.01128598	0.011162908	0.011039206	0.010909036	0.0107799	0.010647626	0.010513026	0.010376131	0.010238578	0.01010174
D3_66	26.85	1	0.016745942			D3_66	0.012746215	0.012676588	0.012603808	0.012531943	0.012464213	0.012398577	0.01233419	0.012272737	0.012214032	0.012152063	0.012090411	0.012025745	0.011960127	0.0118925	0.011823482	0.011754489	0.0116781	0.011599802	0.011516646	0.011429615	0.011340461	0.011249728	0.011157959	0.011063383	0.010969339	0.010875101	0.010790133	0.010704273	0.010616011	0.010522976	0.01042707	0.01032741	0.010227352	0.010121553	0.010015278	0.009909229	0.009799923	0.009691396	0.009578289	0.009463831	0.009348023	0.009233396	0.00911966
D3_67	25	1	0.017102666			D3_67	0.014420839	0.014346328	0.014264993	0.014183432	0.014111578	0.014041917	0.013972961	0.013907928	0.01384649	0.013783545	0.013720744	0.013651409	0.013579551	0.013503633	0.01342532	0.013346597	0.013255282	0.013160546	0.013057793	0.012950745	0.012841382	0.012729534	0.012617379	0.012504183	0.012390726	0.012276372	0.012172795	0.012068551	0.01196254	0.011851443	0.011737416	0.01161655	0.011495766	0.011371097	0.011245451	0.011119589	0.010987826	0.010856288	0.010717749	0.010576774	0.010433317	0.010289643	0.010146497
D3_68	28	2	0.017120087			D3_68	0.010296633	0.010252485	0.010205269	0.010158219	0.010115751	0.010076364	0.010042566	0.010007771	0.009972468	0.009938151	0.009904322	0.00986785	0.009830416	0.009791307	0.009749805	0.009707821	0.009662446	0.009613918	0.009558671	0.009503857	0.009449225	0.009391496	0.009332658	0.009271074	0.009210254	0.009149599	0.009097217	0.00904484	0.008991874	0.008933714	0.008871911	0.00880861	0.008745299	0.008678605	0.008610271	0.008540845	0.008466466	0.008392281	0.008315806	0.008237346	0.008156927	0.008076276	0.00799572
D3_69	25.37170076	1	0.018836525			D3_69	0.009676372	0.009620508	0.009562989	0.009506449	0.00945725	0.009411297	0.009370693	0.00932805	0.009284188	0.009243791	0.009204065	0.009159129	0.009111605	0.009060256	0.00900921	0.008958722	0.008904621	0.008847683	0.008784441	0.008721085	0.008657672	0.008596452	0.008535158	0.008473039	0.008410789	0.008348053	0.008299554	0.008251069	0.008199082	0.008143684	0.0080861	0.008022287	0.007958051	0.007891169	0.00782044	0.007746593	0.007670723	0.007595415	0.007516807	0.007437333	0.007356905	0.007276302	0.007196384
D3_70	22.5166605	2	0.01685887			D3_70	0.011128175	0.01107505	0.011017951	0.010960915	0.010907464	0.010855912	0.01080605	0.01075614	0.01070659	0.010655871	0.010605425	0.010551038	0.010498806	0.010448473	0.010395106	0.010341035	0.010280405	0.010218758	0.010154258	0.010086907	0.010017986	0.009945563	0.009873528	0.009802725	0.009732339	0.009661799	0.009598885	0.009535524	0.009470711	0.009402548	0.009332396	0.009257384	0.009182135	0.009103869	0.00902378	0.008942482	0.008857834	0.008773169	0.008682917	0.008591963	0.008500245	0.008409833	0.008320148
D3_71	22	1	0.01756407			D3_71	0.011899279	0.011839535	0.011777877	0.011717102	0.011660414	0.011606348	0.011555773	0.011506711	0.011459245	0.011410845	0.011362723	0.011310685	0.011258239	0.011204555	0.011147961	0.011090608	0.011025247	0.010957604	0.010884711	0.010809156	0.010732101	0.010654089	0.010575782	0.010496577	0.010419098	0.010342331	0.010276167	0.010210043	0.010142867	0.010070781	0.009995414	0.009915675	0.009835762	0.009752151	0.009665823	0.009577412	0.009485175	0.009393116	0.009296537	0.009197616	0.009096302	0.008994261	0.008892203
D3_72	22	1	0.018414077			D3_72	0.012157681	0.012106779	0.012051793	0.011996838	0.01194294	0.011893214	0.011851232	0.011807929	0.011763972	0.011719374	0.011675124	0.011627115	0.011577845	0.011526332	0.01146812	0.011408273	0.011346466	0.011281384	0.011209006	0.011134699	0.011059385	0.010982832	0.010906636	0.010831026	0.010753875	0.010675131	0.010607672	0.01054006	0.010470297	0.010395316	0.010316881	0.010233768	0.010150935	0.010065966	0.009976846	0.009884431	0.009787153	0.009690278	0.009589605	0.009485813	0.009378911	0.009271244	0.009163471
D3_73	28.57883832	1	0.014626131			D3_73	0.011991321	0.011933274	0.011870063	0.011806635	0.011749888	0.011695418	0.011643329	0.011591815	0.011541159	0.01148881	0.011437305	0.011385653	0.011331909	0.011274913	0.011216307	0.011157568	0.011093065	0.011026474	0.010954945	0.010880702	0.010804952	0.010727676	0.010650536	0.01057374	0.01049741	0.010420929	0.01035367	0.010286553	0.010219598	0.01014879	0.010075592	0.009996699	0.009917326	0.009834258	0.009748989	0.009662195	0.00957018	0.009477944	0.00938013	0.009279558	0.009176257	0.00907392	0.008972087
D3_74	23.3826859	1	0.019158271			D3_74	0.012647621	0.012584028	0.012517598	0.012451938	0.012390226	0.012331948	0.012279065	0.012226424	0.01217438	0.01211973	0.012064666	0.012002487	0.011941076	0.011879751	0.011814547	0.011748523	0.01167732	0.011603354	0.011523062	0.011440406	0.011356403	0.01127117	0.01118538	0.011098035	0.011011673	0.010925457	0.010851971	0.010778696	0.010704813	0.010625728	0.010543202	0.010455624	0.010367311	0.010273331	0.010178167	0.010082443	0.009980757	0.009879096	0.009772847	0.009664524	0.0095541	0.009443961	0.009333972
D3_75	25	2	0.026797046			D3_75	0.010333427	0.010275613	0.010213863	0.010152426	0.010097784	0.010044627	0.009991731	0.009941522	0.009893788	0.009844525	0.009795755	0.009744997	0.009693946	0.00964188	0.009589824	0.009538101	0.00947986	0.009419694	0.009354926	0.0092887	0.009221648	0.009152839	0.009083756	0.009014012	0.00894506	0.008876264	0.008818711	0.008761468	0.008703882	0.008641822	0.008576767	0.008508369	0.008439469	0.00836622	0.008291612	0.00821624	0.008136048	0.008056214	0.007974093	0.007891082	0.007807167	0.007723768	0.007641059
D3_76	23	2	0.018816418			D3_76	0.009886064	0.009837542	0.009786146	0.009735159	0.009687811	0.009643442	0.00960402	0.009564267	0.009524557	0.009485349	0.00944624	0.009401886	0.009357427	0.009312247	0.009268095	0.009224453	0.009172488	0.009119777	0.009064822	0.009007634	0.008949219	0.008893481	0.008836334	0.008774985	0.00871534	0.008656553	0.008607524	0.00855878	0.008509724	0.008455389	0.008397274	0.008338026	0.008278388	0.008214014	0.008147394	0.008079142	0.008007364	0.007935812	0.007861231	0.007785588	0.007708864	0.007630667	0.007552515
D3_77	26.07999731	2	0.022614965			D3_77	0.011153563	0.011087058	0.011015215	0.010943344	0.010880066	0.010819414	0.010761613	0.010706795	0.01065473	0.010598473	0.01054221	0.010482757	0.010421638	0.010357679	0.010294266	0.010231534	0.010163852	0.010094599	0.010021334	0.009947634	0.009873635	0.009801473	0.009729006	0.009655403	0.009583376	0.009512023	0.009452609	0.009394121	0.009337282	0.009275519	0.009210354	0.009142701	0.009074322	0.009000101	0.008924185	0.008847182	0.008764972	0.00868314	0.008599492	0.008513286	0.008424571	0.008338773	0.008254024
D3_78	23	2	0.020411292			D3_78	0.010271963	0.010209436	0.010137516	0.010063961	0.009998689	0.009934618	0.009869313	0.009808827	0.009752593	0.009690998	0.009629833	0.009568363	0.009505564	0.009440294	0.009375389	0.00931097	0.009238002	0.009163746	0.009085941	0.009007505	0.008928691	0.008849857	0.008771051	0.008692081	0.008614219	0.008536653	0.008471957	0.008407371	0.008341211	0.008273105	0.008204179	0.008131353	0.008058435	0.007982552	0.007905514	0.007827842	0.007747144	0.007666962	0.007583959	0.007500297	0.007415899	0.007332947	0.007251057
D3_79	27.71281292	2	0.030773682			D3_79	0.008554501	0.00850397	0.008449108	0.008394177	0.008342135	0.00829145	0.00824103	0.00819162	0.008143373	0.008092773	0.008042637	0.007990907	0.007940123	0.007889806	0.007839	0.00778848	0.007734353	0.007679836	0.007623724	0.007566619	0.007508955	0.007450799	0.007392768	0.007334947	0.007278483	0.007222659	0.007173723	0.007124811	0.007075799	0.007023073	0.006967866	0.006910555	0.006852528	0.006789112	0.0067256	0.006662385	0.006595	0.006528098	0.006460252	0.006392203	0.006323911	0.006259882	0.006197447
D3_80	22.5166605	2	0.023459652			D3_80	0.009945679	0.009898961	0.00984651	0.009793536	0.009744164	0.009696682	0.00965092	0.009609191	0.009570904	0.009527734	0.009484441	0.009439429	0.009392479	0.009342601	0.009293159	0.009244272	0.009189382	0.009132935	0.009072501	0.009011866	0.008951133	0.008889881	0.008827958	0.00876402	0.008701345	0.008639246	0.008584273	0.008530035	0.008478446	0.008422035	0.008362286	0.00829829	0.008233461	0.008163896	0.008092508	0.008019975	0.007941681	0.007863584	0.007782893	0.007700139	0.007615411	0.007532587	0.007450891
D3_81	23	2	0.022508126			D3_81	0.007928614	0.007883123	0.007836353	0.007790531	0.007745012	0.007700194	0.007654266	0.00760825	0.007562496	0.007520067	0.007478794	0.007435172	0.007392565	0.007350635	0.007310306	0.007270751	0.007224163	0.007176871	0.007127411	0.007076862	0.00702574	0.006969847	0.006914998	0.006863247	0.006814841	0.006768599	0.00672606	0.006683348	0.006640738	0.006595344	0.006548179	0.006502025	0.006455483	0.006403563	0.006349042	0.006292536	0.006237493	0.006183416	0.006126876	0.006068663	0.006008814	0.005951717	0.005896208
D3_82	9.6	4	0.055530669			D3_82	0.001831471	0.001831886	0.001835209	0.001839537	0.001841735	0.001844515	0.001849182	0.001855242	0.001862375	0.001867905	0.001873194	0.001879368	0.001885901	0.001892938	0.001899812	0.001906629	0.001915639	0.001923468	0.001929214	0.00193475	0.001940175	0.001944838	0.00194972	0.001955288	0.001961217	0.001967443	0.001973549	0.001980151	0.001988225	0.001996087	0.002003657	0.002009843	0.002015421	0.002019695	0.002025037	0.0020313	0.002037479	0.002044042	0.002053229	0.002062106	0.002070679	0.002078913	0.002087135
D3_83	10.5	4	0.047295025			D3_83	0.002095214	0.002096075	0.002097464	0.002099008	0.002103645	0.002108224	0.002112793	0.002117781	0.002123074	0.002127528	0.002131744	0.002135954	0.00214004	0.002144021	0.002148935	0.002154187	0.002161688	0.002169086	0.002176436	0.002183119	0.002189446	0.002197316	0.002204746	0.002210836	0.002216596	0.002222146	0.002229193	0.002237009	0.002246566	0.002255359	0.002263375	0.002271824	0.002279912	0.00228666	0.00229354	0.002300485	0.002306255	0.002312056	0.002319674	0.002327032	0.002334137	0.00234171	0.002349158
D3_84	11.6	4	0.043498636			D3_84	0.002053338	0.002056675	0.002060961	0.002065469	0.002077658	0.002090991	0.002107921	0.002122575	0.002135363	0.002141843	0.00214696	0.002151142	0.002155762	0.00216096	0.002164304	0.002167243	0.00217653	0.002186735	0.002198879	0.002209645	0.00221968	0.002225542	0.002232679	0.002243746	0.002251338	0.002256431	0.002265822	0.002276921	0.002291833	0.002308179	0.002325527	0.002336984	0.002347753	0.002360161	0.002370194	0.002377994	0.002383574	0.002389501	0.002399621	0.002411578	0.002425265	0.002435827	0.002445238
D3_85	11.7	5	0.075192063			D3_85	0.002829225	0.002827799	0.00282678	0.002825953	0.002824069	0.002823201	0.002825091	0.002826727	0.002828156	0.002825379	0.002822441	0.002822459	0.002821627	0.00281976	0.002818592	0.002817789	0.002819643	0.002821882	0.002824897	0.002827834	0.002830727	0.002834931	0.002838778	0.002841528	0.002843815	0.002845775	0.002849386	0.002853922	0.002860896	0.002866766	0.002871607	0.002877334	0.002883174	0.002889185	0.002894183	0.002898221	0.002901855	0.002905865	0.002912441	0.002918804	0.002924955	0.002932047	0.002939425
D3_86	7.9	5	0.071729116			D3_86	0.00360297	0.00360836	0.003615744	0.00362364	0.003634104	0.003644815	0.003656802	0.003669489	0.003682675	0.00369674	0.003710436	0.003722791	0.003736069	0.003750599	0.003766742	0.003783262	0.003801306	0.003819347	0.003837748	0.00385819	0.00387971	0.003900605	0.003921811	0.003943975	0.003966545	0.00398953	0.004015324	0.004041798	0.004068088	0.004095525	0.00412356	0.004150682	0.004177412	0.004204451	0.004230079	0.004254206	0.004280478	0.004307103	0.004336658	0.004367224	0.004398707	0.004432069	0.004465496
D3_87	12.7	4	0.04668361			D3_87	0.002210197	0.002212666	0.002213132	0.002212811	0.00220989	0.00220817	0.002209739	0.002211493	0.002213387	0.002215274	0.00221758	0.002222645	0.0022276	0.002232471	0.002238503	0.002244808	0.002250378	0.002255557	0.002260101	0.002264025	0.002267619	0.002269429	0.002271554	0.002274733	0.002277151	0.002279024	0.002279839	0.002281427	0.002286166	0.002290552	0.002294575	0.002296488	0.00229873	0.002303826	0.002308423	0.002312528	0.002315727	0.002319053	0.002324134	0.00232901	0.002333686	0.002338881	0.00234391
D3_88	11.8	4	0.054270942			D3_88	0.00177124	0.001765818	0.001764067	0.001763789	0.001764387	0.001764915	0.001765241	0.001766003	0.001767106	0.001770497	0.001773871	0.001775217	0.001776505	0.001777736	0.001779315	0.00178105	0.001784219	0.001786673	0.001787819	0.001789994	0.001792716	0.001791604	0.001791672	0.001795376	0.001797219	0.00179771	0.001799747	0.001802483	0.001806971	0.001812001	0.001817426	0.001821388	0.001824947	0.001827988	0.00183123	0.001834627	0.001838432	0.001842371	0.001847024	0.001852227	0.001857945	0.001862141	0.001866096
D3_89	7.5	6	0.107575066			D3_89	0.001719398	0.001703317	0.001688279	0.001674152	0.00166011	0.001650495	0.001652286	0.001650704	0.001646461	0.001632999	0.00162002	0.001617762	0.001612542	0.001603682	0.001595984	0.001588719	0.001579894	0.001574474	0.001575407	0.001570255	0.001561864	0.001566651	0.00156633	0.001550655	0.001546567	0.001550945	0.00155084	0.001549671	0.001546521	0.001539757	0.001529982	0.001527847	0.001525859	0.001519288	0.001513602	0.001508769	0.001505366	0.001503693	0.001508633	0.001513037	0.001516929	0.001516597	0.001516144
D3_90	3	7	0.356696886			D3_90	0.00566119	0.005699228	0.005736322	0.005771765	0.005821401	0.005871157	0.005924002	0.005975353	0.006025367	0.006077426	0.006129248	0.006183779	0.006235744	0.006285092	0.006342665	0.006402292	0.006464971	0.006528291	0.006594172	0.006661285	0.00672903	0.006801289	0.006874008	0.006947635	0.007021897	0.007097037	0.007178209	0.00726289	0.007352971	0.007446153	0.007540705	0.007638683	0.007735275	0.007827847	0.007917087	0.008002497	0.008091139	0.008179549	0.008274716	0.008371092	0.008468525	0.008568673	0.008668008
D3_91	3.2	7	0.138950923			D3_91	0.004717675	0.004730789	0.004749731	0.004770268	0.00479635	0.004824558	0.004860205	0.004892805	0.004922869	0.004958316	0.00499315	0.00502314	0.00505311	0.005083354	0.00511438	0.005145468	0.005182228	0.005220956	0.005264185	0.005308702	0.005353902	0.005401613	0.005450342	0.005501634	0.005552883	0.005604387	0.005653214	0.005704526	0.005762978	0.00582045	0.005876292	0.005935167	0.005993816	0.006052217	0.006109457	0.006165145	0.006220871	0.006277445	0.0063445	0.006411031	0.006477019	0.006544742	0.006612286
D3_92	7.9	6	0.080582712			D3_92	0.00160055	0.001596764	0.001602502	0.001611699	0.001599685	0.001590872	0.001591272	0.001592515	0.001594422	0.001595971	0.001597226	0.001597272	0.001598901	0.001602463	0.001603244	0.001603104	0.001603575	0.001603275	0.001601511	0.001601407	0.001602183	0.001601728	0.001601929	0.001604049	0.001606852	0.001610172	0.001608565	0.001609422	0.001621251	0.001630662	0.001637856	0.00164041	0.001643552	0.001652346	0.001660947	0.001669295	0.001669725	0.001670144	0.001677353	0.001683288	0.001688011	0.001694433	0.001701472
D3_93	13	4	0.04820548			D3_93	0.002173249	0.002173132	0.002166954	0.002158659	0.002165283	0.002170997	0.002173834	0.00217331	0.002170133	0.002170201	0.002172432	0.002184338	0.002193695	0.002200058	0.002209277	0.002219239	0.002227186	0.002236918	0.002250233	0.002257439	0.002261401	0.002267763	0.002273495	0.002277257	0.002279648	0.002281051	0.002292192	0.002303954	0.002313325	0.002323651	0.00233465	0.002348855	0.002361938	0.002368879	0.002373069	0.002374731	0.002383443	0.002391936	0.002394378	0.002397782	0.002402091	0.002407967	0.002413882
D3_94	25.11473671	1	0.015197853			D3_94	0.01658101	0.016475006	0.01636524	0.016257377	0.016154591	0.016055837	0.015961263	0.015870033	0.01578205	0.015693542	0.015606264	0.015515197	0.015422384	0.015326265	0.0152272	0.015127934	0.015018688	0.014905743	0.01478391	0.014656568	0.014526237	0.014393525	0.014260048	0.014124397	0.013989819	0.013855239	0.013732886	0.013609555	0.013484394	0.013353164	0.013218454	0.013077321	0.01293583	0.012788222	0.012639819	0.012491671	0.012337074	0.01218281	0.012019819	0.011853921	0.011685209	0.011514904	0.011345083
D3_95	21	2	0.021849561			D3_95	0.006998652	0.006976247	0.006948913	0.006920641	0.006890317	0.006861456	0.006834597	0.006808317	0.006782636	0.006752408	0.006722593	0.00669574	0.006668376	0.006640091	0.006614836	0.006590751	0.006561541	0.006532689	0.006503922	0.006474241	0.00644411	0.006412899	0.006379933	0.006342139	0.006306597	0.006272528	0.006242567	0.006212172	0.006180069	0.006146086	0.006110984	0.006075904	0.006040655	0.006002564	0.005963536	0.005923972	0.005881995	0.00584045	0.005798054	0.005755177	0.005711872	0.005667709	0.005624071
D3_96	21	2	0.080263543			D3_96	0.008062919	0.008023988	0.007978923	0.00793282	0.007892695	0.007855231	0.007822307	0.007790865	0.0077608	0.00772292	0.007684239	0.007643745	0.007601477	0.007556511	0.007511623	0.007467073	0.00741761	0.007367694	0.007316152	0.007265498	0.007215268	0.007165687	0.007116063	0.00706625	0.007019039	0.00697342	0.006936481	0.006901151	0.006870141	0.006834233	0.006794638	0.006751264	0.006706799	0.006657603	0.006605602	0.006551403	0.006491819	0.006432343	0.006371946	0.006310198	0.006247123	0.006187903	0.006130259
D3_97	27	1	0.016623162			D3_97	0.015447453	0.015351375	0.015253412	0.01515783	0.015065473	0.014976326	0.014889919	0.014805813	0.01472404	0.014638707	0.014554183	0.014466969	0.01437906	0.014289244	0.014195375	0.0141009	0.013996011	0.013888721	0.013775009	0.013655456	0.013532718	0.013404791	0.013276129	0.013145907	0.013016972	0.012888209	0.012771079	0.012652894	0.012533108	0.012406181	0.012274903	0.01213907	0.012003338	0.011863129	0.011720805	0.011577649	0.01143064	0.011284983	0.011133202	0.010978884	0.010822184	0.010663865	0.010506531
D3_98	30	1	0.020864626			D3_98	0.015264497	0.01518786	0.015106221	0.015025336	0.014947381	0.014871408	0.014795457	0.014724568	0.014658108	0.014585699	0.014513525	0.014438669	0.01436122	0.014279662	0.014194449	0.014108683	0.014010723	0.013909286	0.013799312	0.013684576	0.013567346	0.013444163	0.013320937	0.013197665	0.01307545	0.012953336	0.012842001	0.012729925	0.012616887	0.012498404	0.012376892	0.012246097	0.012114448	0.011977067	0.011839697	0.011703347	0.011559484	0.011415963	0.011264444	0.011110746	0.010954945	0.010797096	0.010639289
D3_99	28.99	1	0.057644627			D3_99	0.013847443	0.013766703	0.013683679	0.013602524	0.013524735	0.013450981	0.013383121	0.013317186	0.013253112	0.013188294	0.013123636	0.0130525	0.012980749	0.012907448	0.012832555	0.012757777	0.012674643	0.012588079	0.012493397	0.012397701	0.012301414	0.012201213	0.012099593	0.011994452	0.011890096	0.011785723	0.011693279	0.011600797	0.011508871	0.011410014	0.011306598	0.011196454	0.011085017	0.010966864	0.010845481	0.01072218	0.010592295	0.010463013	0.010327572	0.010189583	0.01004927	0.009907374	0.009766515
D3_100	9	5	0.0912194			D3_100	0.001316313	0.001320062	0.001328568	0.001334415	0.001341345	0.001354635	0.001367201	0.00137918	0.001390081	0.001399358	0.001406748	0.001416426	0.001425637	0.001432661	0.001439634	0.001446877	0.001460205	0.001474638	0.001490552	0.001504515	0.001518271	0.001532944	0.001548523	0.001564658	0.001579669	0.001596131	0.001615154	0.001633113	0.001650967	0.001670667	0.001689851	0.001708361	0.001725833	0.001742268	0.001756732	0.001771571	0.001786386	0.001800337	0.00181472	0.001830349	0.001847285	0.001864447	0.001881201
D3_101	2.1	7	0.138439751			D3_101	0.005488903	0.005537725	0.005592021	0.005647837	0.005705401	0.005772086	0.005839636	0.005907207	0.005979208	0.006050571	0.006121348	0.006194165	0.006266606	0.006339295	0.00641331	0.006488028	0.00656699	0.006647582	0.006730695	0.006816129	0.006902637	0.006992441	0.007085164	0.007179665	0.007274753	0.007370658	0.007468352	0.007568788	0.007670608	0.00777518	0.007879965	0.007984037	0.008088534	0.00819167	0.008294573	0.008394193	0.008490361	0.008588891	0.008686795	0.00878642	0.008888022	0.008989214	0.009091438
D3_102	2.3	7	0.149606637			D3_102	0.006571135	0.006617669	0.006669319	0.006726683	0.006787553	0.00686025	0.006934295	0.007008614	0.007087977	0.007165164	0.007239958	0.007312986	0.007385547	0.007459963	0.007537434	0.007616316	0.007695155	0.007776072	0.007860055	0.0079502	0.008041386	0.00813299	0.008228003	0.008325134	0.008423129	0.008522668	0.008625225	0.008729508	0.008835137	0.008945441	0.009055374	0.009163979	0.009270355	0.009374914	0.009479049	0.009579445	0.009676145	0.009771374	0.00986774	0.009969001	0.010071343	0.010172998	0.01027605
D3_103	1.8	8	0.19282164			D3_103	0.007736385	0.007794807	0.007856608	0.007922086	0.007991447	0.008076148	0.008164496	0.00825401	0.008342765	0.0084302	0.008516314	0.008607282	0.008697292	0.008784943	0.008876209	0.008969258	0.00906474	0.009163166	0.009265832	0.009367997	0.009471128	0.009579463	0.009690989	0.009804433	0.009918259	0.010033548	0.010151832	0.01027437	0.010399228	0.010529945	0.010660133	0.010788672	0.01091663	0.011041973	0.011164644	0.011283966	0.011399513	0.011514205	0.011628776	0.011746526	0.011865765	0.011984306	0.012105078
D3_104	1.7	8	0.170651317			D3_104	0.007087053	0.007133381	0.007194465	0.007245365	0.007296021	0.007357681	0.00742802	0.007502888	0.00758253	0.007657877	0.007728271	0.007803739	0.007878559	0.007951011	0.008022992	0.00809498	0.00817395	0.008255675	0.008341289	0.008430018	0.0085207	0.008616792	0.008715885	0.008816899	0.00891587	0.00901698	0.009122	0.009227895	0.009335189	0.009448728	0.009565033	0.009683065	0.009794996	0.009904102	0.010011185	0.010118613	0.010224702	0.010325219	0.010425964	0.0105301	0.010637745	0.01074563	0.010854404
D3_105	3	7	0.136164844			D3_105	0.004624937	0.004659378	0.004696871	0.004738649	0.004781765	0.004829079	0.004878144	0.004927977	0.004983725	0.005038026	0.005090767	0.005144159	0.005197843	0.005253705	0.005311187	0.005369393	0.00542812	0.005489103	0.005553243	0.00561847	0.005684227	0.00575198	0.005822888	0.005895767	0.005969363	0.006043179	0.006117666	0.006194182	0.006272018	0.006354479	0.006436376	0.006517037	0.006597697	0.006677163	0.006756252	0.006833178	0.006907689	0.006982886	0.007058587	0.007137359	0.007218027	0.007298529	0.007379991
D3_106	2	8	0.150311285			D3_106	0.007553435	0.007601491	0.007653806	0.007709642	0.007768675	0.007840038	0.007911992	0.007983796	0.008060449	0.00813569	0.008209481	0.008285079	0.008360942	0.008439031	0.008519977	0.008602145	0.00868324	0.008767917	0.008857561	0.008949805	0.009042765	0.009137639	0.009235871	0.009336154	0.009440074	0.009544136	0.009648839	0.009757895	0.009869186	0.009986119	0.010102799	0.010218282	0.010331004	0.010442226	0.010554655	0.010662934	0.010767148	0.01087239	0.010976846	0.011082908	0.011193265	0.011303833	0.011413571
D3_107	5.5	5	0.072893646			D3_107	0.004635375	0.004651608	0.004667496	0.004682748	0.004697612	0.00471319	0.004731695	0.004751107	0.004771177	0.004790633	0.00480957	0.004828141	0.0048469	0.004866052	0.004887811	0.004910116	0.004930342	0.004951769	0.004975852	0.004999791	0.005023663	0.00504797	0.005072117	0.005095787	0.0051201	0.00514503	0.005169065	0.005194586	0.005224345	0.005254172	0.005283655	0.005313448	0.005343075	0.005373107	0.005402364	0.00543067	0.00546034	0.005490371	0.00552427	0.005558982	0.005594417	0.005631323	0.00566849
D3_108	4	5	0.078875124			D3_108	0.007546086	0.007573915	0.007598428	0.007620914	0.007649913	0.007679156	0.007710421	0.007743607	0.007778184	0.007812649	0.007846678	0.007882011	0.007916475	0.007950209	0.007986901	0.008024353	0.008065211	0.008106844	0.008150593	0.008196355	0.00824324	0.008291756	0.008340444	0.008389355	0.008438351	0.008487724	0.008539609	0.008594194	0.008654194	0.008713006	0.00877002	0.008829963	0.008889127	0.008946018	0.009001464	0.009055165	0.009108395	0.009162517	0.009227092	0.009292023	0.009357232	0.00942509	0.009493301
D3_109	1.5	13	0.300256599			D3_109	0.011220987	0.01127937	0.011341515	0.011403227	0.011475453	0.011548813	0.011628956	0.011711223	0.011794908	0.01187121	0.011944359	0.012014264	0.01208525	0.012158189	0.012236835	0.012316773	0.012400934	0.012486321	0.012575406	0.012671106	0.01277045	0.012872662	0.012976983	0.013086512	0.013197358	0.013309898	0.013430545	0.01355831	0.013700632	0.013846001	0.01399207	0.014138471	0.014282568	0.014423435	0.014559303	0.014689547	0.014813227	0.014934911	0.01506629	0.015196933	0.015326749	0.015456447	0.015584345
D3_110	2.8	7	0.143380189			D3_110	0.005716644	0.005719017	0.00571897	0.005717984	0.005717992	0.005718269	0.005719248	0.00572025	0.005721269	0.005720971	0.005720696	0.005721881	0.005723319	0.005725081	0.005729211	0.005734183	0.005741041	0.005748429	0.005756936	0.005766164	0.00577579	0.005785761	0.005794969	0.005802041	0.005808736	0.005815197	0.005821131	0.005827566	0.005835626	0.005842125	0.005847201	0.005853385	0.005859999	0.005867945	0.005877162	0.005887459	0.005901525	0.00591772	0.005942329	0.005969872	0.006000177	0.006036374	0.00607424
D3_111	6.1	6	0.220853848			D3_111	0.002886036	0.002883563	0.002880107	0.002876371	0.002872557	0.00286911	0.002866478	0.002864388	0.002862736	0.00286119	0.002859759	0.002858741	0.002857422	0.002855722	0.002855685	0.002856276	0.002858347	0.002860471	0.002862726	0.002864889	0.002867008	0.002869121	0.002870947	0.002871989	0.0028725	0.002872626	0.002871909	0.002871816	0.002874344	0.002875487	0.002875429	0.002874501	0.002873486	0.002872644	0.002871629	0.002870466	0.002870462	0.002871618	0.002877304	0.002883994	0.002891636	0.002901645	0.002912643
D3_112	2.5	7	0.124247219			D3_112	0.00554878	0.005548162	0.005545376	0.005541835	0.005534505	0.005528223	0.005524624	0.005519195	0.005512346	0.005507016	0.005501659	0.005493946	0.005487816	0.005483552	0.005480511	0.005478125	0.005480632	0.005482581	0.005483503	0.005487402	0.005492887	0.005497199	0.005501296	0.005504945	0.005505336	0.005503347	0.005503148	0.005503488	0.005505038	0.005505089	0.005503866	0.005503297	0.005503693	0.005507626	0.005512835	0.005519156	0.005532699	0.005548592	0.005570974	0.005599144	0.005632792	0.005674135	0.005717588
D3_113	12.5	4	0.045498821			D3_113	0.00247976	0.002478942	0.002478735	0.002478773	0.002483548	0.002488541	0.002494179	0.002500476	0.002507275	0.002512728	0.002517713	0.002521876	0.002526352	0.002531249	0.002536832	0.002542556	0.002547668	0.002553055	0.002559059	0.002566493	0.002574691	0.002583541	0.002591952	0.0025991	0.002607036	0.002615596	0.002625168	0.002635154	0.002645621	0.002654785	0.002662708	0.002670526	0.00267802	0.002684602	0.00269051	0.002695756	0.002699812	0.00270419	0.002711593	0.002719726	0.002728539	0.002736542	0.002744464
D3_114	10	5	0.06155023			D3_114	0.002316083	0.002320918	0.002323752	0.002325722	0.002328553	0.00233242	0.002339302	0.00234647	0.002353842	0.002359311	0.002364952	0.002374186	0.002383288	0.002392313	0.002401665	0.002410994	0.002419565	0.002428918	0.002439911	0.002450417	0.002460676	0.002470421	0.002479653	0.002487539	0.002496563	0.00250648	0.00251481	0.002523781	0.002535171	0.002545564	0.002554964	0.002565925	0.00257676	0.002586546	0.002595816	0.002604543	0.00261444	0.002624749	0.002637122	0.002649487	0.002661832	0.002675909	0.002690293
D3_115	9	5	0.063340461			D3_115	0.00256189	0.002561641	0.002562156	0.002562953	0.002565134	0.002567474	0.00257031	0.002575381	0.002582206	0.002587904	0.002593265	0.002598389	0.00260264	0.002605866	0.002611335	0.002617453	0.002622195	0.002627384	0.002633508	0.002640016	0.002646738	0.002655044	0.002663044	0.002670018	0.002678088	0.002687015	0.002696287	0.002706514	0.002719429	0.002732049	0.002744247	0.002755762	0.002766456	0.002774747	0.002783543	0.002792724	0.002799831	0.00280712	0.00281784	0.002828582	0.002839333	0.0028511	0.002863322
D3_116	7.9	5	0.06504988			D3_116	0.002062304	0.002060088	0.002056263	0.002051927	0.002049307	0.002047717	0.002048766	0.002050908	0.002053909	0.002054788	0.002055318	0.00205603	0.002056336	0.00205615	0.002056434	0.002056888	0.002057679	0.002058411	0.002059043	0.002059506	0.00205988	0.002060314	0.002060806	0.002061447	0.002062877	0.002064896	0.002066784	0.002069961	0.002077684	0.002084056	0.002089191	0.002094976	0.00210019	0.002102903	0.002106036	0.002109524	0.002111151	0.002113167	0.002118816	0.002123078	0.002126018	0.002130739	0.002136008
D3_117	7.25	5	0.197146566			D3_117	0.001768584	0.001771452	0.001775061	0.001778855	0.001778614	0.001779382	0.001783176	0.00178699	0.001790801	0.001794054	0.001797128	0.001800074	0.001803994	0.001809142	0.001812952	0.001816339	0.001821449	0.001826064	0.001829805	0.001833452	0.001837051	0.001839671	0.001842983	0.001848283	0.001851821	0.001854093	0.001858755	0.001864258	0.001871513	0.001877483	0.001882283	0.001886992	0.001892045	0.001898845	0.00190441	0.001908819	0.001913343	0.001918507	0.001927108	0.001935342	0.001943227	0.001950972	0.001958802
D3_118	7.2	5	0.087223215			D3_118	0.001914093	0.00191528	0.001915167	0.001914554	0.001916093	0.001918237	0.001922048	0.001926863	0.001932457	0.00193731	0.001941786	0.001945292	0.001948877	0.001952592	0.001956115	0.001959593	0.001964473	0.001968727	0.001971862	0.001976618	0.00198224	0.001987704	0.001993038	0.001998034	0.002002136	0.00200561	0.002012245	0.002019581	0.002027729	0.002035515	0.002042885	0.002049784	0.002056774	0.002064787	0.002071654	0.002077426	0.002083097	0.002089074	0.002097233	0.002105559	0.002114035	0.002122701	0.002131371
D3_119	10.9	5	0.070080149			D3_119	0.002174386	0.002179488	0.002182311	0.002184166	0.002189141	0.002194604	0.002201552	0.002209655	0.002218636	0.002228296	0.002237881	0.002247416	0.00225577	0.002262766	0.002271996	0.002281841	0.002290621	0.00229983	0.002310004	0.002319411	0.002328417	0.002336548	0.002345108	0.002354926	0.002363509	0.002371242	0.002380013	0.002390753	0.00240757	0.002424213	0.002440487	0.002454815	0.002468793	0.00248334	0.002496702	0.002508887	0.002520725	0.002532563	0.002545994	0.002559102	0.002571894	0.002585734	0.002599622
D3_120	11.1	5	0.068870173			D3_120	0.001718201	0.001728892	0.001737639	0.001745367	0.001752286	0.001760012	0.001770449	0.001782426	0.001795569	0.001806212	0.001815767	0.001822558	0.001829724	0.001837418	0.001848448	0.001860354	0.001869101	0.001878297	0.001888491	0.001897922	0.001906951	0.001919232	0.001930779	0.001939973	0.001950506	0.001962087	0.001972677	0.001985814	0.002007822	0.002026773	0.002042866	0.002060513	0.002077198	0.002089776	0.00210239	0.002114938	0.0021253	0.002135526	0.002148131	0.002160472	0.002172555	0.002185806	0.002199049
D3_121	8.1	4	0.065342196			D3_121	0.002690372	0.002688572	0.00268409	0.002678706	0.002674326	0.002671619	0.002673277	0.002675167	0.002677234	0.002677728	0.002678103	0.002679441	0.002680225	0.00268034	0.002680802	0.002681362	0.002681579	0.002682181	0.002683525	0.002684625	0.002685596	0.002686099	0.002686754	0.002687873	0.002688807	0.002689612	0.00269159	0.002694842	0.00270206	0.002708291	0.002713592	0.002717801	0.002721535	0.002724221	0.002726323	0.002727876	0.002728261	0.002729012	0.002732556	0.002735573	0.002738087	0.002741229	0.002744657
D3_122	5.9	6	0.107632211			D3_122	0.002937038	0.002939217	0.002939578	0.002939221	0.002943583	0.002948251	0.002953775	0.002959271	0.002964721	0.002971159	0.002977311	0.002981434	0.002985548	0.002989689	0.00299497	0.003000588	0.003006359	0.003012393	0.003019023	0.003027393	0.003036699	0.003042759	0.00304915	0.0030568	0.003064382	0.003071962	0.00308027	0.003089497	0.003101196	0.003112646	0.00312373	0.003135805	0.003147448	0.003157213	0.003166828	0.00317623	0.003186079	0.003196629	0.003211222	0.003225576	0.003239691	0.00325663	0.00327419
D3_123	7	5	0.068126056			D3_123	0.002477054	0.002479542	0.002481928	0.002484199	0.002488633	0.002493323	0.002498871	0.002505111	0.002511873	0.002517152	0.002522077	0.002527003	0.002530647	0.002532764	0.002535234	0.002537922	0.002543621	0.002549688	0.00255656	0.002562323	0.0025675	0.002573525	0.002579716	0.002586262	0.002591435	0.002595637	0.002600876	0.002607214	0.002616746	0.002624966	0.002631954	0.002639878	0.002647423	0.002653171	0.002658549	0.002663546	0.002668836	0.002674849	0.002684642	0.002694268	0.002703726	0.002714569	0.002725803
D3_124	5.4	6	0.099198422			D3_124	0.002022749	0.002035839	0.00204291	0.002047426	0.002053073	0.00206035	0.002072473	0.002083643	0.00209403	0.002105044	0.002116318	0.002129619	0.0021427	0.002155617	0.002168276	0.002180669	0.002192184	0.002204048	0.002216787	0.002227442	0.002237001	0.002249047	0.002260673	0.002270842	0.002280233	0.002289115	0.002298194	0.002309123	0.002326041	0.002341446	0.002355334	0.002371559	0.00238763	0.002402075	0.002415774	0.002428672	0.002442443	0.002456493	0.002472702	0.002489861	0.002507896	0.002529521	0.00255121
D3_125	2.9	7	0.134931288			D3_125	0.004062152	0.004078993	0.004095483	0.004111314	0.004131164	0.0041519	0.004176094	0.004199703	0.004222788	0.004246734	0.004270716	0.004296494	0.004320585	0.004342809	0.004369177	0.004396724	0.004425942	0.004455899	0.00448777	0.004519523	0.004551245	0.004586459	0.004621406	0.004655159	0.004688748	0.004722433	0.004755161	0.004789778	0.004829482	0.004869059	0.004907984	0.004946238	0.004983895	0.005021024	0.005058068	0.005094709	0.005131183	0.005168317	0.005212892	0.005258315	0.005304477	0.005352546	0.005401096
D3_126	10.5	5	0.077000059			D3_126	0.002661146	0.002665143	0.002667164	0.002668356	0.002677055	0.002685674	0.002694192	0.002704213	0.002715399	0.002724224	0.002732497	0.002740818	0.002748549	0.002755626	0.002763252	0.002771013	0.002779665	0.002789496	0.002801739	0.002812495	0.002822468	0.002834084	0.002846271	0.002859811	0.002871309	0.00288138	0.002894595	0.002908907	0.002925045	0.002940135	0.00295412	0.002968174	0.002981685	0.002993487	0.00300419	0.003013802	0.003022942	0.003032454	0.003045185	0.003057876	0.003070511	0.003083734	0.003096948
D3_127	7.2	6	0.068241562			D3_127	0.001877873	0.001889109	0.001898829	0.001907652	0.001917944	0.001928336	0.001939564	0.001950273	0.001960534	0.001969759	0.001979169	0.00199178	0.002004195	0.002016481	0.002028187	0.0020396	0.002051988	0.002065735	0.002082303	0.002095465	0.002106821	0.002115971	0.002126431	0.002140696	0.002152762	0.002163292	0.002171858	0.002182094	0.002198598	0.002214008	0.002228268	0.00224263	0.00225665	0.002269831	0.002281552	0.002291853	0.002301936	0.002312579	0.002327243	0.002340539	0.00235252	0.002366469	0.002381032
D3_128	10.1	5	0.05769411			D3_128	0.002552622	0.002561642	0.002565103	0.002566308	0.002572031	0.002578142	0.002585472	0.002593564	0.002602244	0.002607427	0.002613041	0.002625409	0.002636193	0.002645137	0.002655344	0.002665803	0.002675407	0.002686678	0.002701341	0.002712778	0.0027225	0.002735343	0.002748758	0.002763402	0.002778125	0.002792989	0.002809144	0.002826528	0.002846893	0.002866118	0.002884095	0.002901855	0.002919184	0.002935582	0.00295081	0.002964834	0.002980132	0.002995836	0.003014259	0.003031961	0.003048941	0.003067312	0.003085853
D3_129	6	6	0.067334074			D3_129	0.002783823	0.00279323	0.002802864	0.002812273	0.002823487	0.002835503	0.002850371	0.002864764	0.002878744	0.002892859	0.002907055	0.002923116	0.002939215	0.002955488	0.002971668	0.00298774	0.003006643	0.003025552	0.003044824	0.003065151	0.003086046	0.003106408	0.003127356	0.003149958	0.003172214	0.00319435	0.003217963	0.003242896	0.003270542	0.003299533	0.003329275	0.003359331	0.003389005	0.003418124	0.003446583	0.003474185	0.003501252	0.003528265	0.003558687	0.003588936	0.003618968	0.003650361	0.00368185
D3_130	9.5	5	0.160084894			D3_130	0.002776382	0.002779397	0.002784111	0.002789332	0.002793057	0.002797793	0.002805665	0.002813892	0.00282238	0.002831075	0.002839619	0.002847969	0.00285597	0.00286361	0.002872739	0.002882397	0.002895165	0.002907625	0.00291972	0.002932193	0.002944875	0.002957992	0.002971393	0.002985502	0.002999215	0.003012723	0.003027854	0.003044058	0.003062515	0.003081543	0.003100799	0.003118214	0.003135082	0.003151622	0.003167828	0.003183586	0.003198476	0.003213482	0.003231522	0.00325009	0.003269127	0.003288758	0.003308495
D3_131	3.9	7	0.15953777			D3_131	0.003584229	0.003596473	0.003607414	0.003617495	0.003630873	0.003643949	0.003656867	0.003670615	0.003684985	0.003702609	0.003720819	0.003741175	0.003760102	0.003777451	0.003799097	0.003821881	0.003843682	0.003865275	0.003886896	0.00390693	0.003926118	0.003951312	0.00397542	0.00399595	0.004016067	0.004035997	0.004059389	0.004084283	0.00411181	0.004138103	0.004162967	0.004190303	0.004217751	0.004245233	0.004271498	0.004296426	0.004323681	0.004351729	0.004384845	0.004420259	0.004457782	0.004498342	0.004539409
D3_132	3	7	0.305997871			D3_132	0.003795765	0.003810105	0.00382435	0.003838098	0.003857635	0.003877014	0.003896866	0.003917484	0.003938675	0.003960094	0.003980948	0.004000378	0.004018918	0.004036514	0.004057723	0.00407997	0.004103908	0.004128523	0.004154893	0.004182336	0.004210362	0.004240624	0.00427146	0.004303576	0.004335001	0.004366116	0.004399703	0.004435117	0.004474002	0.004512806	0.004551003	0.004588372	0.004625071	0.004660914	0.004695154	0.004727622	0.004760639	0.004793684	0.004830299	0.004868631	0.004908524	0.004950886	0.004993438
D3_133	3.5	7	0.102292994			D3_133	0.004145972	0.004170428	0.004196182	0.004221603	0.004250489	0.004280386	0.004314752	0.004351103	0.004388938	0.004423814	0.004457734	0.004492772	0.004527416	0.004561862	0.004597969	0.004634276	0.004672533	0.004711817	0.004753793	0.004795797	0.004837827	0.004882227	0.004927516	0.004974949	0.005022536	0.005070531	0.005120444	0.005173002	0.005231251	0.005290366	0.005349404	0.005407916	0.005465666	0.005523017	0.005578136	0.005630741	0.005682777	0.005734534	0.005791604	0.005849276	0.005907417	0.005966218	0.006024671
D3_134	2	9	0.139877911			D3_134	0.006864775	0.00690198	0.006939513	0.006975943	0.007021031	0.00706713	0.007118514	0.007171912	0.00722678	0.007277983	0.007327856	0.007379131	0.00742834	0.00747544	0.007527602	0.007580997	0.007639001	0.00769944	0.007765657	0.007832298	0.007899164	0.00797359	0.00804856	0.008124224	0.008199538	0.008275025	0.008352526	0.00843324	0.008520041	0.008607736	0.00869498	0.008781587	0.008866773	0.008950089	0.00903149	0.00911042	0.009189745	0.009269014	0.009357173	0.009448244	0.009541915	0.009641146	0.009740978
D3_135	2	9	0.228488296			D3_135	0.004852545	0.004869666	0.004885236	0.004899706	0.004917486	0.004935813	0.004956595	0.004976243	0.004994942	0.005011511	0.005027562	0.00504446	0.005061705	0.005079508	0.005099732	0.005120708	0.005145821	0.005171771	0.005199782	0.005229631	0.00526047	0.005292312	0.005324062	0.005355428	0.005387155	0.005419346	0.005452212	0.005486223	0.005522042	0.005556561	0.005589486	0.005621019	0.005651839	0.005681872	0.005710773	0.005738389	0.005767596	0.005798306	0.005838254	0.005881004	0.005926337	0.005977547	0.006030483
D3_136	2.8	8	0.248366153			D3_136	0.003835502	0.003845232	0.003857559	0.003870498	0.00388536	0.00390017	0.003915643	0.00393337	0.003952847	0.003972284	0.003991102	0.004008298	0.004026056	0.004044643	0.004064676	0.004085042	0.004107177	0.004130252	0.004155527	0.00418058	0.004205534	0.00423262	0.004259622	0.004286116	0.004312814	0.004339832	0.00436663	0.004394694	0.004425694	0.004457037	0.004488242	0.004519495	0.004550279	0.004580314	0.00460992	0.004638875	0.004668521	0.004698533	0.004733131	0.004769528	0.004807573	0.004847104	0.004887122
D3_137	2.1	8	0.270034962			D3_137	0.00473755	0.004755619	0.004774271	0.004792562	0.004812575	0.004833417	0.004857687	0.004883126	0.004909422	0.004933279	0.004956382	0.004979999	0.005003701	0.005027706	0.00505305	0.0050787	0.005107538	0.00513742	0.005169788	0.005203025	0.005236761	0.005272591	0.005308767	0.005345575	0.005382583	0.005419983	0.005456415	0.005494005	0.005533804	0.005574497	0.005615407	0.005655743	0.005695434	0.005734493	0.005773526	0.005812204	0.005851708	0.005891664	0.005937536	0.005984882	0.006033562	0.006084789	0.006136436
D3_138	3	7	0.189589016			D3_138	0.002355026	0.002365162	0.0023737	0.002381344	0.00239086	0.002400172	0.002409423	0.002421326	0.002435291	0.002444145	0.002452499	0.00246411	0.002475461	0.002486595	0.002498466	0.002510484	0.002523672	0.0025368	0.00255006	0.002564456	0.002579455	0.002595573	0.002611238	0.002625575	0.002641528	0.002658755	0.002676166	0.002693964	0.00271205	0.002730988	0.002750395	0.002766826	0.002782436	0.002797408	0.002812789	0.002828408	0.002843386	0.002858755	0.00287831	0.002900618	0.002925498	0.002952963	0.002981219
D3_139	4.1	7	0.167212411			D3_139	0.003164674	0.003171796	0.003179552	0.003187301	0.003196972	0.003207077	0.003218908	0.003233216	0.003249467	0.003265851	0.00328197	0.003298071	0.003314271	0.00333071	0.003350171	0.003370395	0.00339002	0.003410421	0.003432683	0.003454759	0.003476747	0.003502608	0.003527913	0.003551243	0.003574712	0.003598431	0.003622585	0.003648394	0.003678473	0.003708136	0.003737026	0.003768159	0.003798701	0.003826423	0.003854181	0.003881716	0.003909317	0.003937211	0.003969758	0.004002937	0.004036653	0.004073538	0.004111126
D3_140	2.8	8	0.113849468			D3_140	0.003338967	0.003332837	0.003326431	0.003320125	0.003313758	0.003308137	0.003304207	0.003300392	0.003296678	0.003293512	0.003290361	0.003286393	0.003282967	0.003280172	0.003279039	0.003278525	0.00327907	0.003280044	0.003281847	0.003284234	0.003286931	0.003288079	0.00328947	0.003291692	0.003291987	0.003290871	0.003290191	0.003289702	0.003289764	0.003289217	0.003288155	0.003287372	0.003286493	0.003284995	0.003285226	0.003287023	0.003290533	0.003295175	0.003304147	0.003314974	0.003327541	0.003344348	0.003362184
D3_141	2.8	8	0.163430641			D3_141	0.003372492	0.003375168	0.003376617	0.003377545	0.003381566	0.003386739	0.003395217	0.003404869	0.003415425	0.003424301	0.003432933	0.003442812	0.003452446	0.003461862	0.003471227	0.003480601	0.0034933	0.003506115	0.003519392	0.003534354	0.003550214	0.00356578	0.003581821	0.00359919	0.003615982	0.003632452	0.003647845	0.003664123	0.003683082	0.003702275	0.0037214	0.003740541	0.003758977	0.003775338	0.003793824	0.003814071	0.003832969	0.003852396	0.003877731	0.003904051	0.00393126	0.003962609	0.003994561
D3_142	1.7	10	0.156807002			D3_142	0.007435755	0.007479309	0.007518826	0.00755553	0.007607866	0.007659486	0.007711442	0.007765951	0.007822301	0.007873611	0.007924516	0.007983854	0.008041631	0.008098011	0.008159195	0.008221546	0.00828977	0.008359691	0.008434038	0.008511366	0.008590331	0.008673218	0.008757292	0.008844093	0.00893166	0.009020321	0.009110609	0.009203814	0.009301267	0.009401744	0.009503427	0.009604866	0.009705249	0.009806079	0.009905278	0.01000215	0.010100548	0.010199144	0.010308721	0.01042043	0.01053401	0.010649444	0.010764386
D3_143	2.8	8	0.113632076			D3_143	0.004693363	0.004713417	0.004733268	0.004752442	0.004782269	0.004811199	0.00483878	0.004868193	0.004898937	0.004928375	0.004956865	0.004984236	0.005011556	0.005039072	0.005071417	0.005105147	0.00514092	0.005178084	0.005218463	0.005258983	0.005299626	0.005343037	0.005386675	0.005430539	0.005474527	0.005518886	0.005566598	0.005616995	0.005672636	0.005727113	0.005779875	0.005833784	0.005886739	0.005937591	0.00598624	0.006032509	0.006081882	0.006132403	0.006191108	0.006252148	0.00631536	0.006382996	0.00645152
D3_144	2.5	8	0.172553047			D3_144	0.004012593	0.004033125	0.004051998	0.004069683	0.004097165	0.004124775	0.004153835	0.004182621	0.004211031	0.00423904	0.004266358	0.004293234	0.004320673	0.004349084	0.004379052	0.004409261	0.004440254	0.004472333	0.004506956	0.004544393	0.004583367	0.004622531	0.004662031	0.004702416	0.004742301	0.004782089	0.004823384	0.004866273	0.004911822	0.004956785	0.005000668	0.005044574	0.005088381	0.005134248	0.005179023	0.005222497	0.005267817	0.005314138	0.005368525	0.005424869	0.005483054	0.005544999	0.005607257
D3_145	13.8	3	0.049122816			D3_145	0.00451167	0.004497021	0.004482207	0.004467743	0.004453712	0.004440003	0.00442635	0.004414302	0.004403595	0.004394576	0.004385698	0.004374854	0.004365096	0.004356554	0.00435154	0.004347693	0.004341835	0.004334462	0.004324089	0.004316207	0.004309646	0.004301931	0.004293857	0.004284942	0.004275225	0.004264854	0.004256966	0.00424936	0.004242211	0.004232686	0.004221268	0.004207938	0.004193834	0.004176965	0.004162606	0.00415061	0.004136359	0.004122763	0.004112764	0.004103495	0.004094917	0.004090543	0.004086886
D3_146	13.8	3	0.034676342			D3_146	0.005162451	0.005142926	0.005120431	0.005097349	0.005075754	0.005055357	0.00503708	0.005020101	0.005004254	0.004987283	0.004970519	0.004954267	0.004937906	0.004921222	0.004907214	0.004894228	0.004881151	0.004867068	0.004850899	0.004835343	0.004820076	0.004806674	0.004792921	0.004778062	0.004763489	0.004749009	0.004741077	0.004733867	0.004727072	0.004717873	0.004706746	0.004695062	0.004682878	0.00466831	0.004653152	0.004637549	0.004622555	0.004608259	0.004595348	0.004582574	0.004569922	0.004560318	0.004551379
D3_147	10.8	4	0.043197493			D3_147	0.004050614	0.004031777	0.004007867	0.003982589	0.003962142	0.003942832	0.003925361	0.003909833	0.003895938	0.003881304	0.003866752	0.003851823	0.003836422	0.003820269	0.003806526	0.003793687	0.003780142	0.003766637	0.00375306	0.003739802	0.003726684	0.003714152	0.003701166	0.003686931	0.003671715	0.003655658	0.003643411	0.003631952	0.003622512	0.00361114	0.003598267	0.00358546	0.003572953	0.003560902	0.003548268	0.00353518	0.003522741	0.003511421	0.003503702	0.003496263	0.003489085	0.003484352	0.003480606
D3_148	11.2	3	0.034517226			D3_148	0.004499519	0.004481887	0.004458633	0.00443379	0.004412287	0.004391094	0.004369392	0.004348565	0.004328563	0.004312638	0.004297976	0.004284864	0.004270219	0.004253534	0.004237457	0.004221832	0.004208504	0.004192876	0.004172651	0.004152941	0.004133475	0.004119268	0.004104578	0.004087997	0.004070879	0.00405324	0.004040178	0.00402763	0.004015797	0.0040036	0.003991246	0.003974842	0.003958001	0.003940974	0.003925063	0.003910252	0.003895058	0.003880153	0.003865437	0.003852861	0.003842315	0.003833663	0.003826298
D3_149	17.2	2	0.025275285			D3_149	0.007684115	0.007652413	0.007614493	0.007575186	0.007543464	0.007513264	0.00748516	0.007459492	0.007435899	0.007410261	0.00738486	0.007360033	0.00733571	0.007311734	0.007287562	0.007263447	0.007236848	0.007209959	0.007182149	0.007154305	0.007126402	0.007095416	0.007064458	0.00703395	0.007003669	0.006973335	0.006947995	0.006923269	0.006900233	0.00687483	0.006847732	0.006818734	0.006789339	0.006757898	0.006724813	0.006690453	0.006654677	0.006619334	0.006583748	0.006547607	0.006510923	0.006474214	0.006437656
D3_150	15	2	0.025274615			D3_150	0.007092579	0.007064668	0.007036614	0.007009234	0.006981916	0.006956882	0.00693672	0.006917075	0.006897967	0.006879913	0.006862061	0.006842235	0.006822937	0.006804062	0.006785936	0.0067681	0.006747046	0.006726315	0.006705944	0.006682972	0.006658574	0.006635988	0.006612217	0.006585051	0.006559618	0.006535269	0.006512232	0.006490034	0.006471626	0.006449136	0.006423465	0.00639719	0.006370571	0.006341327	0.006311808	0.006282215	0.006249718	0.006217756	0.006187684	0.006156134	0.006123148	0.006090773	0.006058672
D3_151	11.5	3	0.033459375			D3_151	0.00636073	0.006320586	0.006277856	0.006235138	0.006193627	0.006152697	0.006111124	0.006069503	0.006028131	0.005987265	0.00594713	0.00590626	0.005866562	0.005827827	0.005790063	0.005753029	0.005718355	0.005683375	0.005647441	0.005612489	0.005578	0.005543908	0.005509482	0.00547413	0.005438557	0.005402541	0.00537146	0.005340373	0.005308995	0.005275031	0.005239275	0.00520258	0.0051665	0.005131292	0.005096871	0.005063331	0.005031068	0.005000336	0.004972905	0.004947718	0.004924651	0.004905801	0.004888321
D3_152	5	6	0.104003227			D3_152	0.00268635	0.002673568	0.00265875	0.0026435	0.002630724	0.002618225	0.002605682	0.002592685	0.002579418	0.002565788	0.002552398	0.002539288	0.002525849	0.002511853	0.002498359	0.002485251	0.002474626	0.002464058	0.002453483	0.002442844	0.002432152	0.002422276	0.002412436	0.00240261	0.002392808	0.002382948	0.002377258	0.00237195	0.002366636	0.002361755	0.002357295	0.002352784	0.002348341	0.002343938	0.002339249	0.002334327	0.002330868	0.00232815	0.002327389	0.002328117	0.002330271	0.002334095	0.002338764
D3_153	10	4	0.040565523			D3_153	0.003908332	0.003906991	0.003906578	0.00390682	0.003907506	0.003908865	0.003910909	0.003913456	0.003916446	0.003919296	0.003922002	0.003924483	0.0039264	0.003927835	0.003929626	0.003931724	0.003933923	0.003936247	0.003938735	0.003940777	0.003942617	0.00394475	0.0039466	0.003947794	0.003949286	0.003951193	0.003953575	0.003956559	0.003960198	0.003963721	0.003966989	0.003969913	0.003972606	0.003975157	0.003977904	0.003981084	0.003985588	0.003991682	0.003999627	0.00400978	0.004022046	0.004035862	0.004051128
D3_154	17.2	3	0.048374854			D3_154	0.005095558	0.005062955	0.005030092	0.004997969	0.004964359	0.004931479	0.004898964	0.004867368	0.004836691	0.004807534	0.004779141	0.004750566	0.004722361	0.004694303	0.004667488	0.004641306	0.004614858	0.004588211	0.004560885	0.00453242	0.004503287	0.004475788	0.004448479	0.004421566	0.004394592	0.004367369	0.004343642	0.004320489	0.004299413	0.004276485	0.004252257	0.004228369	0.004205013	0.004182255	0.004159567	0.004137077	0.004116411	0.004096965	0.004079822	0.004063829	0.004048924	0.004037425	0.0040271
D3_155	18	3	0.03534061			D3_155	0.005964114	0.005937938	0.005906178	0.005873023	0.005844753	0.005817669	0.00579216	0.005768518	0.005746508	0.005723664	0.005701102	0.005678547	0.005656819	0.005635857	0.005613421	0.005590608	0.005566679	0.005542599	0.005517975	0.005491742	0.00546459	0.005438111	0.005411454	0.005384306	0.005355994	0.005326606	0.005304229	0.005282531	0.005261728	0.00523831	0.00521295	0.005187505	0.005162095	0.00513536	0.005107428	0.005078561	0.005049611	0.005021218	0.004992889	0.004964836	0.004937021	0.004911488	0.004886662
D3_156	20.5	2	0.02081049			D3_156	0.007995706	0.007971397	0.007944794	0.007917987	0.007893567	0.0078702	0.007848288	0.007827871	0.007808769	0.007788153	0.007767911	0.00774908	0.007728606	0.007705885	0.007682549	0.007659159	0.007634538	0.007607728	0.007576415	0.007544402	0.00751197	0.007479179	0.007445613	0.007409998	0.007373923	0.007337244	0.007307385	0.007277088	0.007244174	0.007209759	0.007174488	0.007135293	0.007095678	0.007054477	0.007012429	0.00696985	0.006924059	0.006878084	0.00682967	0.006780997	0.006732026	0.006683161	0.006634253
D3_157	20.7	2	0.020577492			D3_157	0.007615361	0.007577509	0.00753519	0.007492226	0.007452454	0.007414683	0.007380164	0.00734575	0.007311637	0.007276726	0.007242153	0.007206459	0.007170954	0.007135282	0.007100089	0.007065275	0.007028332	0.006990572	0.006950797	0.006910871	0.006870801	0.006829298	0.006787704	0.006746071	0.006703754	0.00666062	0.006626511	0.006592686	0.006558234	0.006521026	0.006481927	0.006440268	0.006398379	0.006354725	0.006308287	0.006259606	0.006208832	0.006158603	0.006107914	0.006056312	0.0060038	0.005953513	0.00590428
D3_158	25.11	2	0.019206938			D3_158	0.008841917	0.008786347	0.008726462	0.008666363	0.00862011	0.008575817	0.008533892	0.008493529	0.008454652	0.008410358	0.008365255	0.008316009	0.008265522	0.008212951	0.00815841	0.008103556	0.008047037	0.007989503	0.007929407	0.007869418	0.007809353	0.007750901	0.007693354	0.007638271	0.007582468	0.007525696	0.007482832	0.007441505	0.007402614	0.007358826	0.007311398	0.007257024	0.007201718	0.007143988	0.007082912	0.007019138	0.006950054	0.006881054	0.006810755	0.006740149	0.006669185	0.006600421	0.006532577
D3_159	12	4	0.060537377			D3_159	0.003006134	0.00299534	0.002983629	0.002971896	0.002960946	0.002950431	0.002940427	0.00293112	0.002922421	0.002915998	0.002910042	0.002903768	0.002897698	0.002891807	0.002888035	0.002885072	0.002883295	0.002881425	0.00287935	0.002878102	0.002877292	0.002877013	0.002876943	0.002877383	0.002876614	0.002874956	0.002875081	0.002876012	0.002879084	0.002880865	0.002881529	0.002881352	0.002881133	0.002881281	0.002880983	0.002880281	0.002880341	0.00288127	0.002885698	0.002891412	0.002898355	0.002907863	0.002918245
D3_160	26	2	0.020364712			D3_160	0.008794657	0.008754714	0.008712378	0.00867021	0.008631455	0.008594403	0.008559833	0.008527973	0.008498446	0.008467088	0.00843564	0.008402032	0.008368255	0.008333893	0.008299291	0.008264749	0.008226547	0.008187355	0.0081458	0.008102575	0.008058371	0.00801482	0.007970412	0.007923719	0.007877565	0.007831456	0.007792363	0.007753617	0.007715648	0.0076735	0.007628323	0.007581917	0.007534951	0.007483807	0.007431695	0.007379021	0.007323126	0.007267469	0.007210319	0.007152125	0.007092899	0.007034977	0.006977296
D3_161	4	8	0.112001304			D3_161	0.00384187	0.00386334	0.003885198	0.003906476	0.003932397	0.003959207	0.00399001	0.004022065	0.004055065	0.004087719	0.004119565	0.004150397	0.004182202	0.004215412	0.004250581	0.004286115	0.004325943	0.004366443	0.004409069	0.004453232	0.004498168	0.004546479	0.004595602	0.004646704	0.004697666	0.004748824	0.004802033	0.004857783	0.004918798	0.004980741	0.005042615	0.005103692	0.005164119	0.005224727	0.005283355	0.005339618	0.005395373	0.005450719	0.005511519	0.005573623	0.005636827	0.005700434	0.00576363
D3_162	4.91	7	0.095326534			D3_162	0.002964074	0.002976277	0.00299336	0.003011737	0.003032202	0.003053677	0.003079264	0.003106382	0.003134654	0.00316208	0.003188325	0.003211376	0.003234086	0.003256553	0.003285007	0.003315057	0.003344676	0.003376305	0.003412418	0.003446741	0.003480074	0.003517617	0.003555848	0.00359566	0.003634697	0.003673378	0.003712123	0.003753813	0.003803962	0.003855428	0.003907297	0.0039558	0.004004098	0.004055835	0.004105239	0.004152066	0.004196847	0.004240642	0.004287155	0.004335553	0.004385631	0.004435405	0.004484686
D3_163	11.15	4	0.060078122			D3_163	0.002092629	0.002095613	0.002094313	0.002091405	0.002091265	0.002092285	0.002096385	0.002100831	0.002105543	0.002110004	0.002114421	0.002119322	0.002123069	0.002125445	0.002130008	0.002135193	0.00213901	0.002142496	0.002145424	0.002148902	0.00215267	0.002159265	0.002166268	0.002174067	0.002180804	0.002186805	0.002189621	0.002195025	0.002210863	0.002223535	0.002233305	0.002240049	0.002246285	0.002252697	0.002259259	0.002265895	0.002267047	0.002267828	0.002271683	0.00227491	0.002277537	0.002282253	0.002287587
D3_164	10.97	4	0.059320607			D3_164	0.001335839	0.001335301	0.00133886	0.001343881	0.001344652	0.001346144	0.001349931	0.001353299	0.001356326	0.001364165	0.001372326	0.001378316	0.001382778	0.001385418	0.001392084	0.00139995	0.001406182	0.001412344	0.001418502	0.001425483	0.001432895	0.001441387	0.001449592	0.001456919	0.001463479	0.001469514	0.001478655	0.001487846	0.001495414	0.001503496	0.001511909	0.001518957	0.001526014	0.001534302	0.001539717	0.001542475	0.001547904	0.001553686	0.001559531	0.001565045	0.001570236	0.001576821	0.001583938
D3_165	1.5	8	0.175867976			D3_165	0.01006327	0.010119718	0.010178081	0.010235239	0.010299257	0.010364201	0.010435626	0.010509017	0.010583805	0.010659063	0.010733022	0.010806737	0.010880492	0.010954854	0.011034094	0.011114095	0.011197881	0.01128292	0.011372114	0.011467138	0.011565223	0.01166906	0.011774405	0.011883384	0.011995519	0.01211067	0.012227855	0.01235002	0.012482304	0.01261862	0.012756447	0.012895226	0.013032361	0.013167456	0.013298512	0.013424629	0.013543842	0.013660469	0.013785629	0.01391138	0.014037443	0.014161693	0.01428421
D3_166	3.48	6	0.088640487			D3_166	0.00622555	0.006257517	0.006287107	0.00631481	0.006346856	0.006380673	0.006421259	0.006462393	0.006503861	0.006547043	0.006590129	0.006635564	0.006681337	0.006727884	0.006777226	0.006827095	0.00688172	0.006938162	0.006999131	0.007059074	0.007118476	0.007183287	0.007249085	0.007316994	0.007384118	0.007451077	0.00751894	0.007590221	0.007669266	0.007748133	0.007825734	0.007903639	0.007980716	0.008057456	0.008131568	0.008202616	0.008273579	0.0083444	0.008423247	0.008503313	0.008584404	0.008665763	0.008746591
D3_167	2.64	6	0.109194409			D3_167	0.007844342	0.007888562	0.007930555	0.007970318	0.008021338	0.008072247	0.00812547	0.008182123	0.008241315	0.008298402	0.008355005	0.00841749	0.008476009	0.008530205	0.008593403	0.008658996	0.008728083	0.00879818	0.008871557	0.008947817	0.009025607	0.009108931	0.009192785	0.009277581	0.009364736	0.00945416	0.00954499	0.009639888	0.009743386	0.009849966	0.009957688	0.010064697	0.010170028	0.010273973	0.010373147	0.010467133	0.010561292	0.010654527	0.010754573	0.010855456	0.010957009	0.011059624	0.011161381
D3_168	13.52	5	0.055323629			D3_168	0.000373077	0.00038009	0.00038462	0.000388043	0.000400985	0.00041461	0.000430514	0.00044257	0.000451546	0.00046307	0.000475799	0.000494493	0.000507357	0.00051327	0.000521483	0.000530677	0.000547651	0.000562551	0.000573878	0.000583677	0.000592656	0.000600832	0.000611599	0.00062952	0.000644306	0.000656883	0.000669559	0.000683602	0.000701816	0.000722547	0.00074514	0.000754919	0.000763337	0.000775092	0.000786271	0.000796819	0.000806449	0.000815113	0.000821218	0.000829893	0.000840973	0.000851542	0.000862306
D3_169	2.35	7	0.137007272			D3_169	0.005228085	0.005257425	0.005290942	0.005324932	0.005359703	0.005395163	0.005435594	0.005479084	0.005525049	0.005569161	0.005612875	0.00566024	0.005707358	0.00575441	0.005801995	0.005849082	0.005901077	0.00595355	0.006008437	0.006065777	0.006124213	0.006186636	0.006250054	0.006316347	0.00638477	0.006455172	0.006525978	0.006597934	0.006670662	0.006747623	0.006827318	0.006907813	0.006987165	0.007063121	0.007139527	0.007215421	0.007288934	0.007360547	0.007435693	0.007511836	0.007588714	0.007667525	0.007745131
D3_170	2.72	7	0.137298223			D3_170	0.004960874	0.00499336	0.005025807	0.005057148	0.0050942	0.005132499	0.005177142	0.005222762	0.005269201	0.00531562	0.005361361	0.00540741	0.005452298	0.005496007	0.005542099	0.005588411	0.005640121	0.005691975	0.005745546	0.005802784	0.005861794	0.005924225	0.005987798	0.006054606	0.006122367	0.006191249	0.006260941	0.006333236	0.006411304	0.006493086	0.006577046	0.00666024	0.006742708	0.006824587	0.006903642	0.006979181	0.007051401	0.007121729	0.007196081	0.007271316	0.007347163	0.007423739	0.00749936
D3_171	1.26	10	0.232496607			D3_171	0.007124577	0.007173895	0.00722687	0.007279484	0.007336154	0.007394359	0.007461288	0.007530753	0.007602311	0.007675877	0.007748702	0.007821587	0.007892656	0.007961844	0.008036444	0.008111789	0.008191268	0.008271581	0.008355587	0.008443283	0.008532738	0.008625464	0.008719438	0.008817082	0.00891545	0.009014992	0.00911759	0.00922345	0.009334649	0.009449969	0.009567431	0.009688874	0.009810177	0.009930782	0.01004774	0.010160003	0.010270134	0.010377833	0.010490989	0.010605304	0.010720402	0.010836101	0.010949146
D3_172	3.29	7	0.098081261			D3_172	0.004156123	0.004180202	0.00420699	0.004233908	0.004264588	0.004296396	0.00433371	0.00437234	0.004412032	0.004453874	0.004495949	0.004541315	0.004585731	0.004629237	0.004674078	0.00471872	0.004766612	0.004815636	0.00486814	0.004919717	0.004970668	0.0050284	0.005087188	0.005148556	0.005211249	0.005275285	0.005339226	0.005406243	0.005481398	0.005558655	0.005636708	0.00571575	0.005794189	0.00587163	0.005947658	0.006021504	0.006091692	0.006159914	0.00623183	0.006305939	0.006381893	0.00645567	0.00652794
D3_173	2.38	8	0.121347843			D3_173	0.005045137	0.005073808	0.005103754	0.005133171	0.005180814	0.005228471	0.005278906	0.005330847	0.005383985	0.00543996	0.005495217	0.005548927	0.005602473	0.005656137	0.005706769	0.005755888	0.005813132	0.005871388	0.005933074	0.00599819	0.006064971	0.006129831	0.006197742	0.006274556	0.006351026	0.00642768	0.006504942	0.006586185	0.00667765	0.006771609	0.006866423	0.006961684	0.007055497	0.007145967	0.007233134	0.007316298	0.007395905	0.007474224	0.007560487	0.007647354	0.007734536	0.007821462	0.007906948
D3_174	0.37	15	0.422711548			D3_174	0.008741303	0.008790442	0.008841714	0.008892068	0.008952138	0.009015224	0.009090407	0.009167563	0.00924615	0.009325264	0.009402821	0.009479202	0.009553768	0.00962669	0.009702013	0.009777249	0.00985697	0.009937871	0.010022847	0.010110573	0.010199689	0.010297398	0.010396693	0.010499666	0.010604027	0.01071002	0.010815781	0.010927211	0.011053015	0.011182481	0.011313252	0.011443492	0.011573031	0.011705082	0.011833717	0.011957964	0.012073167	0.012185386	0.012306032	0.012426669	0.012547014	0.012665519	0.01278177
D3_175	0.27	17	0.75106733			D3_175	0.008101974	0.008155697	0.008211202	0.008265517	0.008331973	0.008400064	0.008476725	0.008558254	0.008643579	0.008717714	0.008790075	0.00887118	0.008949136	0.00902382	0.009107017	0.009192159	0.009284243	0.009379332	0.00948227	0.009585956	0.009689936	0.009810793	0.009933678	0.010060468	0.010191186	0.010325578	0.010461188	0.010604131	0.01076507	0.010928265	0.011091073	0.01125465	0.011416081	0.011573685	0.011728041	0.011877892	0.012015395	0.012149181	0.012293815	0.012439743	0.01258657	0.012731666	0.012874268
D3_176	0.26	16	0.621183508			D3_176	0.00756822	0.007626267	0.007678217	0.007726036	0.007801558	0.007881321	0.007977024	0.008070345	0.008161644	0.008249242	0.008335252	0.00842502	0.008507746	0.008582533	0.008668734	0.008757866	0.008857394	0.008962361	0.009080115	0.009198793	0.009317785	0.00945529	0.009595564	0.009741971	0.009885103	0.010026656	0.010177186	0.010337899	0.010523389	0.010708221	0.010889805	0.011076139	0.011261549	0.011446698	0.011619513	0.011779321	0.011931898	0.012081744	0.012245302	0.012408419	0.012570749	0.012733408	0.012893087
D3_177	0.37	15	0.57301995			D3_177	0.011446825	0.011529084	0.01161242	0.011694237	0.011802795	0.011911438	0.012024548	0.012139766	0.012255911	0.012369178	0.012479948	0.012590636	0.012705112	0.012825573	0.012951143	0.013078194	0.013220709	0.013367509	0.013523968	0.013687054	0.013853919	0.014031062	0.014210007	0.0143927	0.014578185	0.014767131	0.014969934	0.0151819	0.015410137	0.01563916	0.01586633	0.016099295	0.016327315	0.016544895	0.016755747	0.016959512	0.017163959	0.017366307	0.017575728	0.017779669	0.017978547	0.018175589	0.018367729
D3_178	0.78	12	0.24524546			D3_178	0.008083016	0.008140839	0.008202814	0.008264996	0.008339957	0.008416148	0.00849895	0.008582595	0.008666364	0.00874814	0.008828107	0.008907972	0.008988284	0.009070054	0.009156	0.009243255	0.009342431	0.009442694	0.009545998	0.009653032	0.009762253	0.009879631	0.009998667	0.010121249	0.010243208	0.01036568	0.010503183	0.010645843	0.010793272	0.01094172	0.011089431	0.011238352	0.01138416	0.01152517	0.011659963	0.011788465	0.011922261	0.012056082	0.012197017	0.012337149	0.012476631	0.012616258	0.012754009
D3_179	1.42	10	0.19988383			D3_179	0.006651409	0.006680627	0.00671123	0.006741693	0.006777161	0.006812057	0.006846906	0.006881863	0.006916667	0.006953097	0.006988718	0.00702181	0.007057369	0.00709637	0.007139596	0.007184236	0.007235076	0.007286754	0.007340524	0.007396717	0.007454306	0.007518372	0.007581986	0.007643662	0.007707674	0.007773925	0.007842536	0.007912953	0.007985338	0.008056225	0.00812509	0.00819637	0.008265375	0.008327847	0.008390324	0.00845256	0.008520469	0.008590191	0.008669521	0.008748738	0.008827952	0.008915303	0.009003897
D3_180	3.35	7	0.100237448			D3_180	0.004120623	0.004151029	0.004184962	0.004219187	0.004254953	0.004291614	0.004332908	0.004376173	0.004420899	0.004463223	0.00450467	0.004547708	0.004589606	0.004630437	0.004674848	0.004719924	0.00476519	0.004811533	0.004860782	0.004912348	0.004965096	0.005021447	0.005078434	0.005137007	0.005197082	0.005258585	0.005320341	0.005384402	0.005453173	0.005523586	0.005594511	0.005662486	0.005729936	0.005799911	0.005866704	0.005930029	0.00599321	0.006056159	0.006125266	0.006195898	0.006267839	0.006338798	0.006408887
D3_181	3.86	7	0.121221493			D3_181	0.00349569	0.003512876	0.003534642	0.003557479	0.0035802	0.00360397	0.003632147	0.003663531	0.003697405	0.003728068	0.003757688	0.003787491	0.003818129	0.003849999	0.003885668	0.003922132	0.003957802	0.003995006	0.004035857	0.004079131	0.004123641	0.004169309	0.004215386	0.004262658	0.004311278	0.004361164	0.004412815	0.004466711	0.004525085	0.00458518	0.004645973	0.004706025	0.004765401	0.004824674	0.004881459	0.004935465	0.004989847	0.005044137	0.005104031	0.005165015	0.0052269	0.005289913	0.005352793
D3_182	13.3	4	0.055868875			D3_182	0.001875979	0.001873315	0.001870266	0.001867163	0.001870217	0.001874235	0.001880809	0.001885969	0.001889989	0.001894084	0.001898001	0.001901224	0.001903987	0.00190621	0.001908094	0.001909923	0.00191373	0.001917705	0.001922072	0.001926926	0.001932035	0.001935947	0.001940558	0.001947212	0.001953014	0.001958227	0.00196494	0.001972482	0.001982003	0.001992054	0.002002428	0.002011861	0.002020555	0.002027204	0.002032101	0.002035364	0.002039485	0.002043441	0.002046337	0.002049207	0.002052047	0.002055563	0.002059778
D3_183	11.5	5	0.08057531			D3_183	0.002025985	0.002026719	0.002026086	0.002024945	0.002021811	0.002019695	0.002020334	0.002022232	0.002025128	0.002025883	0.002026344	0.002027333	0.002027948	0.002028115	0.002030089	0.002032627	0.002034668	0.002036687	0.002038705	0.002042734	0.002047823	0.002052138	0.002055707	0.002057361	0.002061155	0.002066535	0.002068771	0.002071897	0.002079368	0.00208433	0.002087068	0.002090311	0.002093475	0.002096093	0.00209885	0.002101708	0.002102013	0.002103234	0.002111045	0.002118326	0.00212509	0.002132963	0.002141512
D3_184	8.37	5	0.072619154			D3_184	0.003248535	0.003240781	0.003235662	0.003231724	0.003228854	0.003226453	0.003225124	0.003225604	0.00322752	0.003227	0.003226577	0.003229193	0.003230883	0.003231459	0.003232538	0.003233949	0.003239544	0.003245199	0.003251077	0.003258182	0.003265926	0.003275127	0.003284418	0.003293835	0.003303028	0.003312108	0.003321598	0.003331245	0.003340758	0.003351058	0.003361899	0.003370451	0.003378455	0.003386051	0.003394262	0.003402957	0.003410523	0.003418731	0.003431856	0.003446457	0.003462424	0.003482137	0.003503095
D3_185	1.67	7	0.195355919			D3_185	0.011892148	0.011936148	0.011973385	0.01200691	0.012056313	0.012106701	0.012161793	0.012223286	0.01228963	0.012354149	0.012416983	0.012478441	0.012540582	0.012604131	0.012674979	0.012747609	0.012821536	0.012898017	0.012980559	0.013067157	0.013155881	0.013251234	0.013348019	0.013448265	0.013546275	0.013643237	0.013749632	0.013862426	0.013988226	0.014115444	0.014242338	0.014369775	0.014496407	0.014625383	0.014748042	0.014864044	0.014978909	0.015092734	0.015214369	0.01533625	0.015458271	0.015579459	0.015699157
D3_186	11.5	5	0.062213928			D3_186	0.001112124	0.001111071	0.001113398	0.001116956	0.001121464	0.001125635	0.001129098	0.001134259	0.001140765	0.001147605	0.001154348	0.001160853	0.001167477	0.001174287	0.001181212	0.001188121	0.001195953	0.001203615	0.001211119	0.00121702	0.001222064	0.001230418	0.001238496	0.001245507	0.001251639	0.001257164	0.001265108	0.00127407	0.001285288	0.001295624	0.001305068	0.001313985	0.001322408	0.001329429	0.00133595	0.001341954	0.001346215	0.001350236	0.001355111	0.001361727	0.001369975	0.00137761	0.001385539
D3_187	7.3	5	0.072400238			D3_187	0.000915644	0.000926931	0.000929515	0.000928653	0.000925511	0.000927198	0.000942309	0.0009539	0.000962673	0.000965855	0.000968087	0.000970695	0.000972615	0.000973713	0.000980445	0.000989016	0.000998183	0.001006085	0.00101176	0.00102291	0.001036936	0.001047848	0.001057973	0.001066378	0.001074067	0.001081276	0.00108982	0.001099494	0.001112231	0.001123733	0.001134025	0.001140389	0.001147284	0.001159248	0.00116782	0.001173225	0.001177702	0.001182551	0.001190491	0.001199096	0.00120831	0.001218174	0.001228723
D3_188	1.221600407	10	0.177839523			D3_188	0.007872815	0.00791329	0.007960724	0.008009243	0.008063652	0.00812019	0.00818642	0.00825666	0.008330066	0.008399908	0.008467808	0.008534698	0.008602529	0.008671888	0.008742365	0.008812325	0.008888071	0.008966983	0.009053842	0.009140916	0.009227843	0.009324674	0.009422576	0.0095231	0.009627724	0.009735854	0.009844481	0.009958077	0.010084466	0.010214454	0.010345832	0.010480512	0.01061391	0.01074375	0.010869817	0.010991105	0.01110635	0.011219072	0.011339807	0.011460644	0.011581138	0.011697675	0.01181184
D3_189	2.9	7	0.133111692			D3_189	0.004495087	0.004520807	0.004552723	0.004585968	0.004621223	0.004657972	0.004701199	0.004746185	0.004792502	0.004836801	0.004879262	0.004917489	0.004957226	0.004999072	0.005041223	0.005083134	0.005131345	0.005180795	0.005233679	0.005289242	0.005346126	0.005407391	0.005469055	0.005531675	0.005596452	0.005663159	0.005727564	0.00579483	0.005869859	0.005946385	0.00602318	0.006099807	0.006174919	0.006246584	0.006316399	0.006383853	0.006447707	0.006510467	0.006578954	0.006647558	0.006716099	0.006785182	0.006854113
D3_190	7.5	6	0.082297782			D3_190	0.002108369	0.002118212	0.002127963	0.002137354	0.002151731	0.002167	0.002185472	0.002204005	0.002222549	0.002243658	0.002264568	0.002283909	0.002303637	0.00232397	0.002343852	0.002363435	0.002386328	0.002409259	0.002432763	0.002455946	0.002478924	0.002506664	0.002535026	0.002564696	0.002592566	0.002619274	0.002649246	0.002680583	0.002713884	0.002746143	0.002777072	0.002808271	0.002838703	0.002866936	0.002894381	0.002920846	0.002948077	0.002974904	0.003002499	0.003031817	0.00306269	0.003095213	0.003127468
D3_191	7.7	6	0.085531198			D3_191	0.001357795	0.001362661	0.001369151	0.001376043	0.001396628	0.001414446	0.001425325	0.001436279	0.001447278	0.001467674	0.001488778	0.001506692	0.001519051	0.001524771	0.001543653	0.001566519	0.001586535	0.001605741	0.001623915	0.001646746	0.001671966	0.001696088	0.001721157	0.001749115	0.001774282	0.001797537	0.001820469	0.00184406	0.001869075	0.001896821	0.001926536	0.00195151	0.001976413	0.002005109	0.002032457	0.002058288	0.002084573	0.002110343	0.00213674	0.00216341	0.00219024	0.002222538	0.002254231
D3_192	1.88	8	0.125020699			D3_192	0.004330245	0.004363887	0.00439754	0.004430081	0.004477115	0.004523673	0.004571252	0.00461972	0.004668773	0.004720297	0.004771508	0.004824062	0.00487524	0.004925139	0.004981424	0.005039029	0.005096125	0.005155171	0.005219187	0.005286644	0.005355814	0.005426505	0.005498246	0.005573077	0.005650117	0.005729186	0.005807834	0.005889346	0.005977087	0.006065983	0.006154674	0.006243146	0.006330342	0.006416032	0.006498489	0.006577229	0.006655704	0.006733828	0.006820148	0.006906695	0.006993252	0.007084037	0.007174304
D3_193	1.85	9	0.147040619			D3_193	0.003978306	0.004030191	0.004076915	0.004120099	0.004175698	0.004231787	0.00429236	0.004355307	0.004419988	0.004480186	0.004539453	0.004604426	0.004666132	0.004724355	0.004790245	0.004857825	0.004927943	0.005001722	0.005084086	0.005164838	0.005244584	0.005333384	0.005422392	0.005511454	0.005608229	0.005711109	0.005810389	0.005912572	0.006021567	0.006132256	0.006242875	0.006356676	0.006468204	0.00657284	0.006673123	0.006768474	0.006868934	0.006968758	0.007073698	0.007179172	0.007284862	0.007393945	0.00750225
D3_194	1.24	10	0.232755955			D3_194	0.007097437	0.007141765	0.007194223	0.007248052	0.007294973	0.007343443	0.007400234	0.007460932	0.007524735	0.007593333	0.007659902	0.007715913	0.007772171	0.007829045	0.007896463	0.007966203	0.008034024	0.008102695	0.008174754	0.008256634	0.008343531	0.008434686	0.008525322	0.008614694	0.008710198	0.008810747	0.008904209	0.009000067	0.009102724	0.009210627	0.00932167	0.009433958	0.009545584	0.009656737	0.009765834	0.009871768	0.00997453	0.010074484	0.010177662	0.010281124	0.010384519	0.010491181	0.010597091
D3_195	2.4	8	0.147933006			D3_195	0.004655466	0.004685737	0.004727694	0.004772724	0.004814319	0.004859289	0.004917117	0.004975891	0.005035426	0.005096797	0.005156755	0.005212399	0.005268889	0.005326711	0.005383403	0.005438703	0.005493107	0.005550524	0.005615142	0.005679666	0.005743962	0.00581439	0.005885136	0.005956607	0.006030787	0.006107348	0.006183439	0.006262379	0.006348103	0.006436121	0.006524968	0.006613917	0.006702175	0.006789944	0.006874921	0.006956369	0.007033992	0.007109876	0.007191321	0.00727421	0.00735817	0.007440614	0.007521618
[truncated: 358 more columns]
